# Supplementary material
Source: PubMed Central journal article supplement (PMC6763222)
Supplement: jci-129-128227-s404.pdf [file jci-129-128227-s404.pdf]

## SUPPLEMENTARY FIGURES AND TABLES

### Genetic Hallmarks Of Recurrent/Metastatic Adenoid Cystic Carcinoma

---

#### SUPPLEMENTARY FIGURES

---

**Figure S1.** Flow diagram of study design.

**Figure S2.** Primary and recurrent/metastatic adenoid cystic carcinoma distribution by anatomic site.

**Figure S3.** Variant allelic frequency (VAF) density histogram for NOTCH1 mutations observed in recurrent/metastatic adenoid cystic carcinoma (R/M ACC).

**Figure S4.** Downsampling analysis of R/M MSK-IMPACT cohort (n=94) to simulate mutation detection at 100x coverage.

**Figure S5.** Representative PyClone plots demonstrating intratumoral heterogeneity quantified as number of genomically distinct subclonal populations in adenoid cystic carcinoma.

**Figure S6.** MRI of the neck with contrast of adenoid cystic carcinoma of right parotid gland involving masseter muscle and ascending ramus.

**Figure S7.** Histologic confirmation of 6 representative distant metastatic sites of a single case with parotid adenoid cystic carcinoma.

**Figure S8.** Fluorescence in situ hybridization (FISH) of distant lung metastatic lesions in a single case of parotid adenoid cystic carcinoma.

**Figure S9.** Two-way plots of cancer cell fraction in a single case of parotid adenoid cystic carcinoma, comparing primary tumor with eight metastatic lesions.

**Figure S10.** Multiregion clonal evolution heatmap analysis of two breast adenoid cystic carcinoma cases with transformation to high grade triple-negative breast cancer (TNBC) histology.

#### SUPPLEMENTARY TABLES

---

**Table S1.** Study distribution of primary and recurrent/metastatic (R/M) adenoid cystic carcinoma (ACC) cases. Mixed entails head and neck, lung, and breast disease sites.

**Table S2.** Top gene alteration incidence by tumor site (includes primary and recurrent/metastatic cases).

**Table S3.** Top gene alteration incidence of recurrent/metastatic adenoid cystic carcinoma (R/M ACC) cases comparing primary site with distant metastatic site.

**Table S4.** Odds ratios for top altered genes comparing primary with recurrent/metastatic (R/M) adenoid cystic carcinoma (ACC) cohorts.

**Table S5.** Variant allele fraction (VAF) for most commonly mutated genes in recurrent/metastatic adenoid cystic carcinoma.

**Table S6.** Downsampling analysis of R/M MSKCC-IMPACT cohort.

**Table S7.** Pyclone subclonal population analysis of 58 adenoid cystic carcinoma patients.

**Table S8.** Pathogenic germline variants detected in recurrent/metastatic adenoid cystic carcinoma.

**Table S9.** BRCA1/BRCA2 second hit analysis.

**Table S10.** MSISensor score for MSK-IMPACT recurrent/metastatic adenoid cystic carcinoma cases.

**Figure S1.** Flow diagram of study design. MDA, MD Anderson Cancer Center; MSK, Memorial Sloan Kettering Cancer Center; Hopkins, Johns Hopkins Medicine; WES, whole exome sequencing; WGS, whole genome sequencing; tNGS, targeted next generation sequencing panel; FM, Foundation Medicine

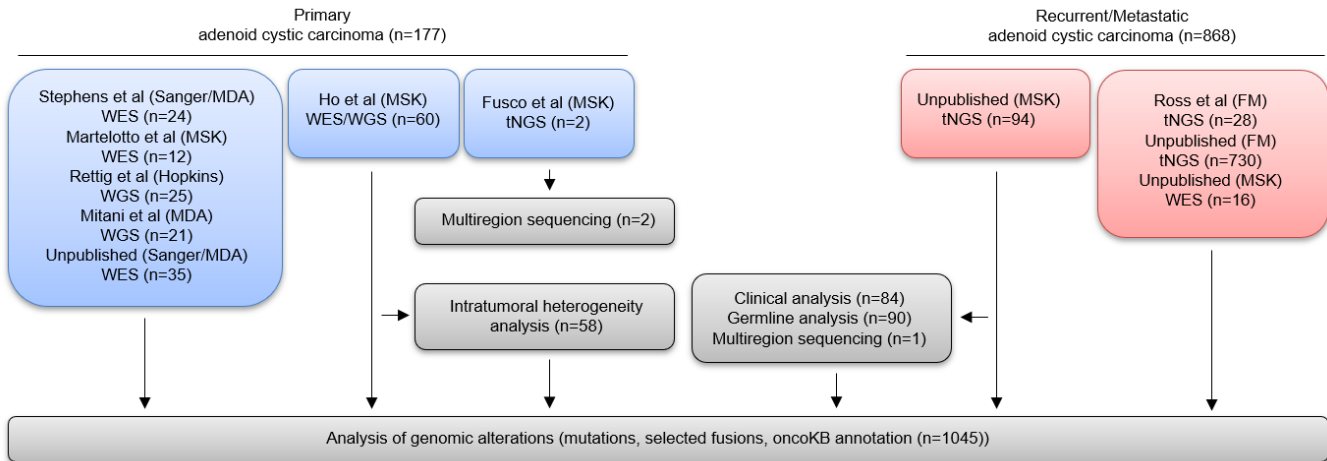

**Figure S2.** Primary and recurrent/metastatic adenoid cystic carcinoma distribution by anatomic site.

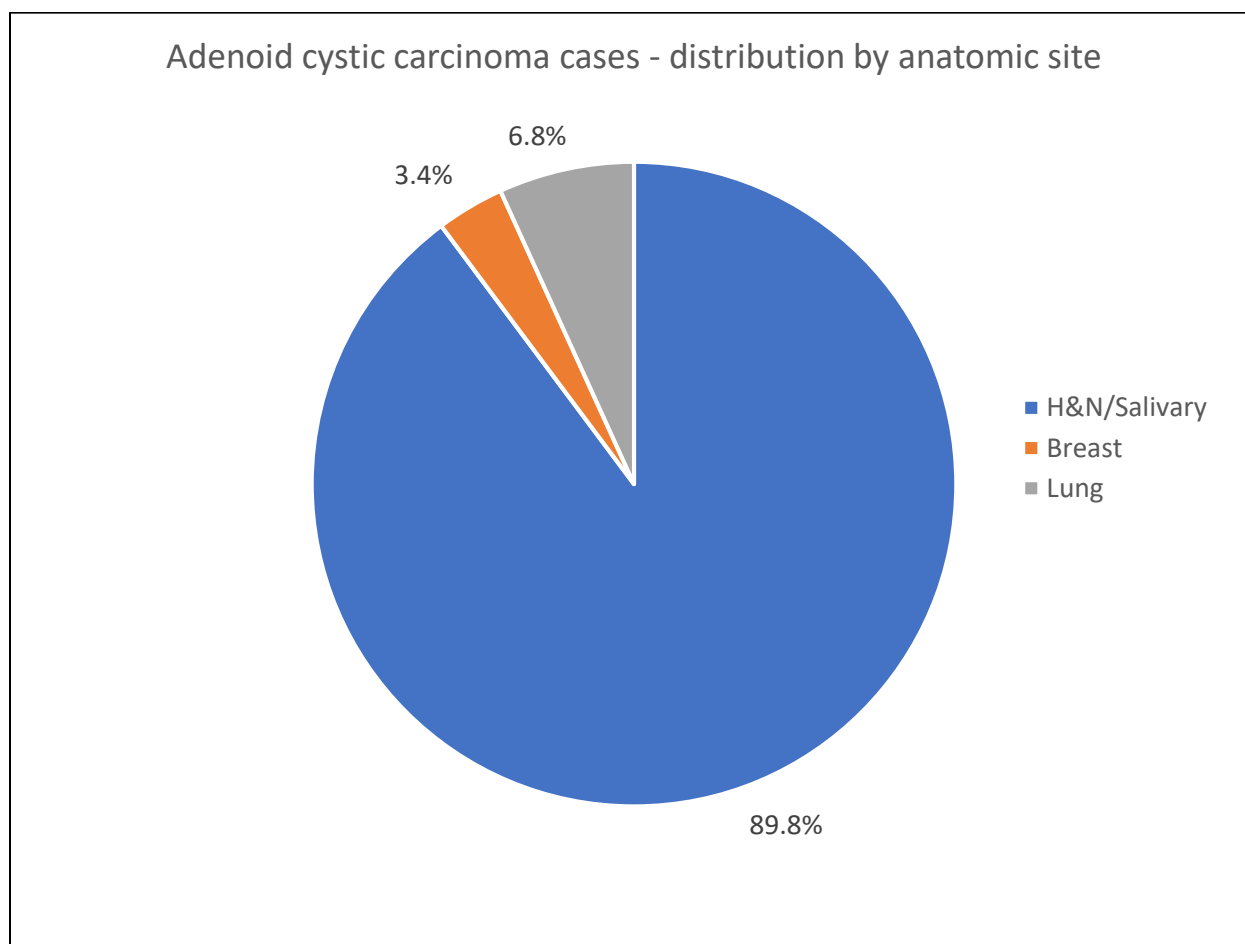

**Figure S3.** Variant allelic frequency (VAF) density histogram for *NOTCH1* mutations observed in recurrent/metastatic adenoid cystic carcinoma (R/M ACC). Cases with diploid *NOTCH1* copy number, demonstrating that only a small fraction of cases had potentially subclonal (VAF<0.1 in 13.5% (43/319) of cases) *NOTCH1* mutations.

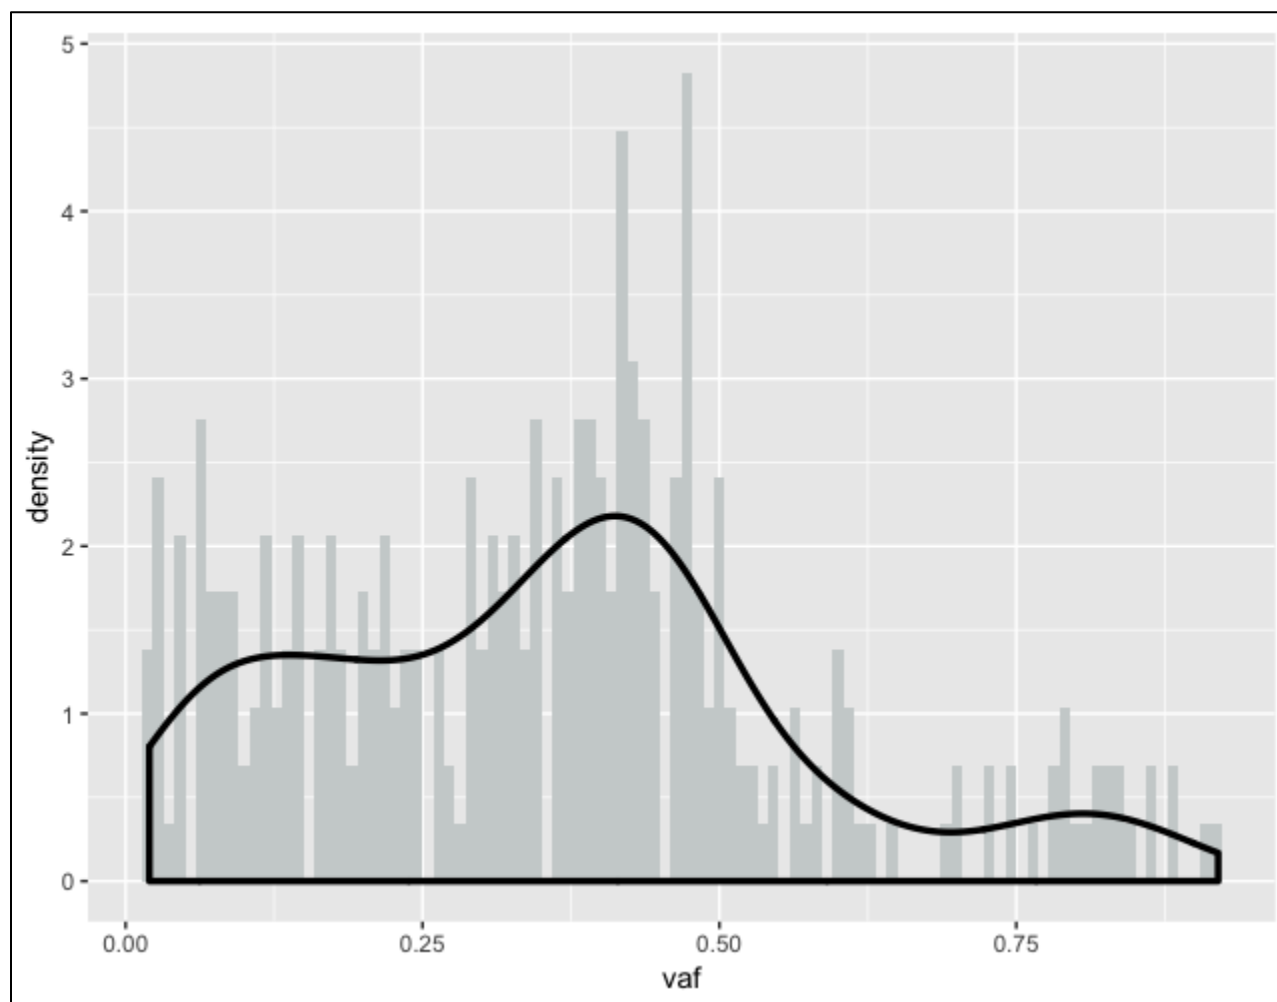

**Figure S4.** Downsampling analysis of R/M MSK-IMPACT cohort (n=94) to simulate mutation detection at 100x coverage. Five independent downsampled bam files from each sample were generated, which were passed through the same mutation caller and with same settings as for WES samples. This analysis showed minimal difference in VAFs between the original (~600x) and downsampled (100x) sequencing, with the VAF changed (decreased) by .011 on average in the downsampled cases. Each dot represents the average VAF, and the vertical line shows the full range (not standard deviation/error) in downsampled VAFs.

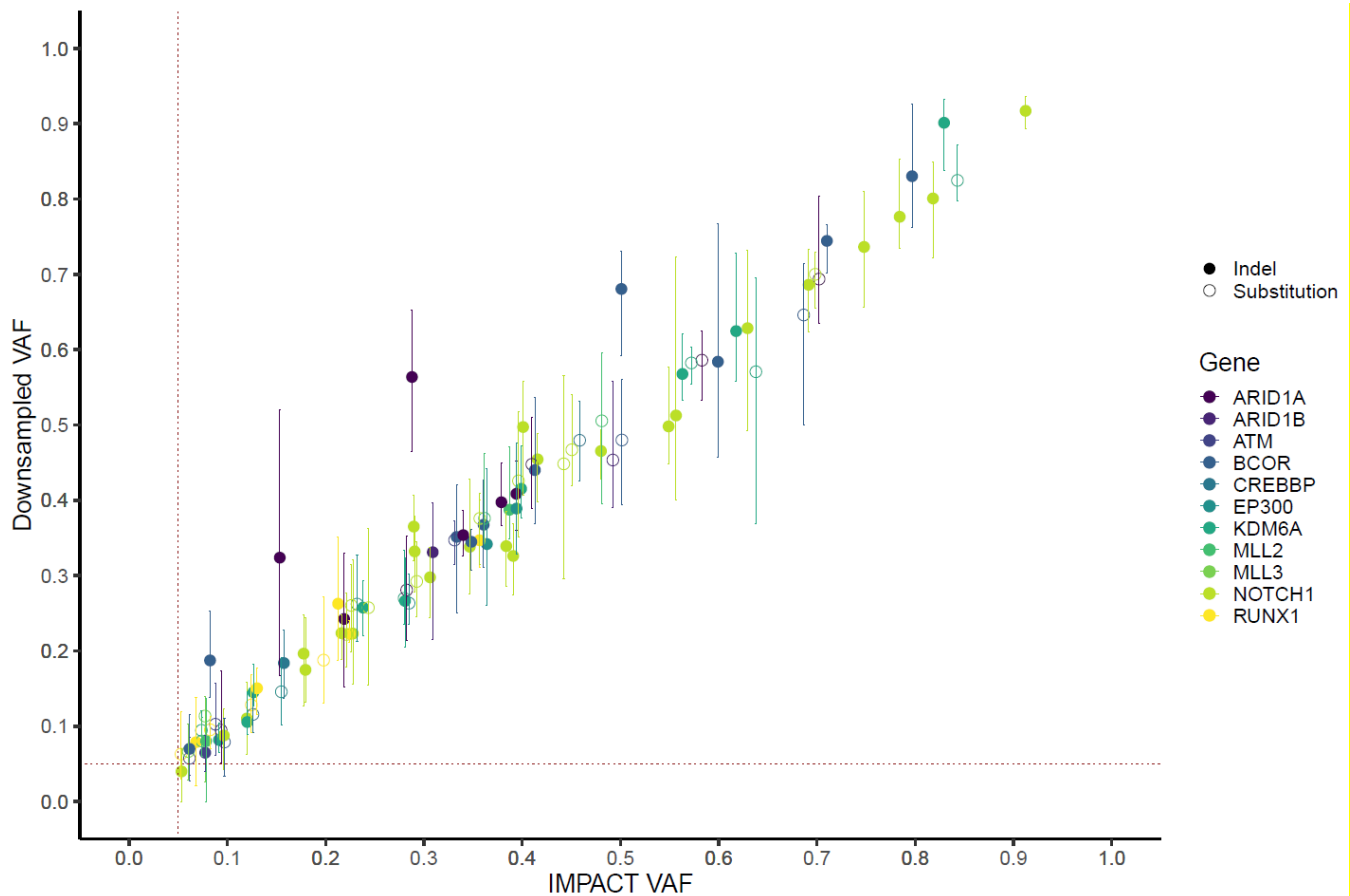

**Figure S5.** Representative PyClone plots demonstrating intratumoral heterogeneity quantified as number of genomically distinct subclonal populations in adenoid cystic carcinoma. (a). Sample 3492. (b). Sample 2000756. (c). Sample 148632. (d). Sample 36773720. (e). Sample D3212. (f). Sample C3070.

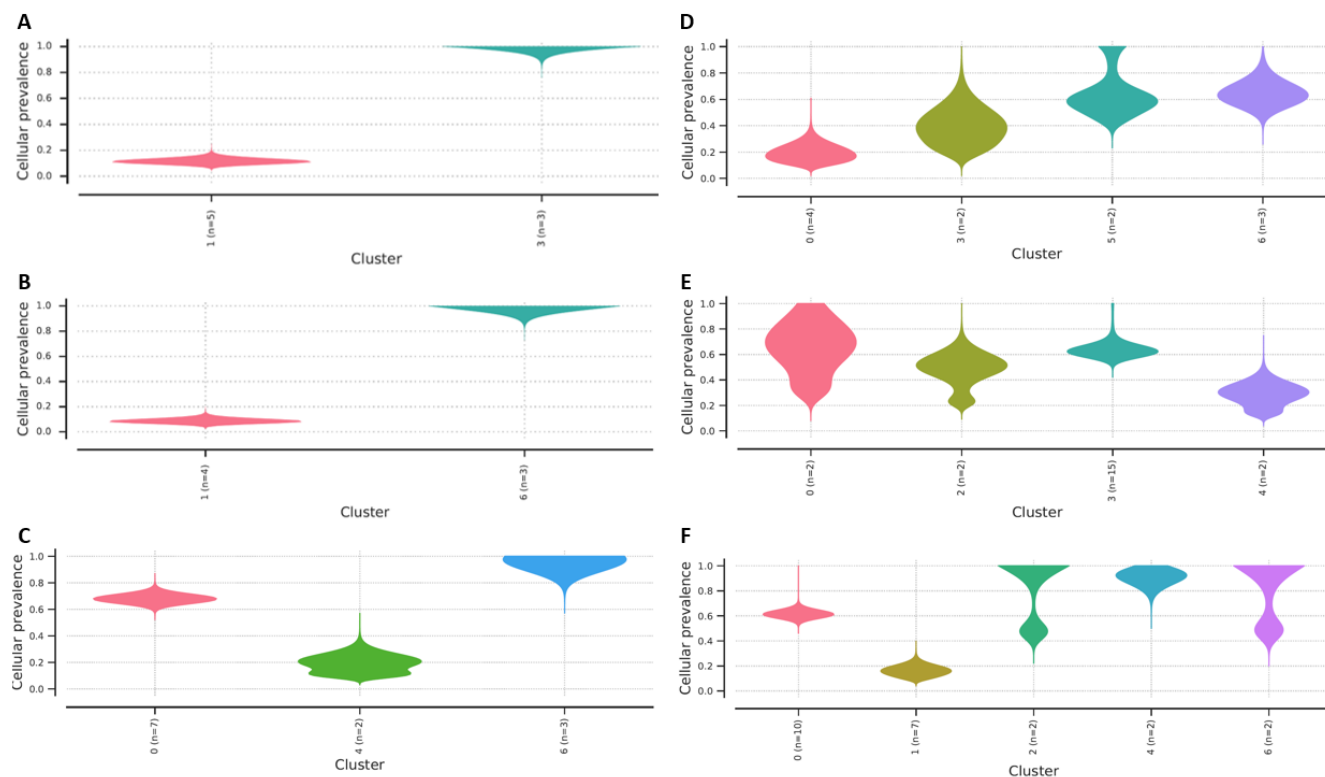

**Figure S6.** MRI of the neck with contrast of adenoid cystic carcinoma of right parotid gland involving masseter muscle and ascending ramus. The primary tumor and 6 subsatial regions underwent whole-exome sequencing followed by validation with deep sequencing. (a). Axial T2 MRI showing 3.8cm hyperintense right parotid mas with involvement of masseter muscle. (b). Coronal T2 MRI showing abutment against ascending ramus of mandible.

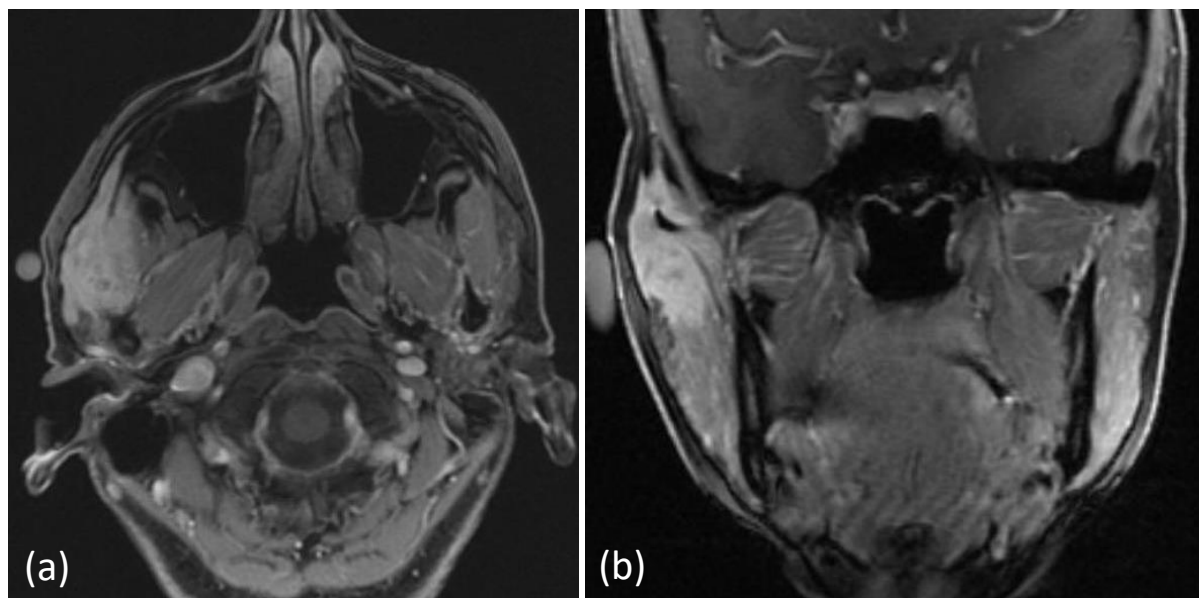

**Figure S7.** Histologic confirmation of 6 representative distant metastatic sites of a single case with parotid adenoid cystic carcinoma. More than 90 distant metastatic lesions were resected. Red arrows demonstrate metastatic sites. (a) Axial chest CT showing distant metastases to right upper lobe. (b) Hematoxylin and eosin (H&E) stain of Metastasis\_5A. (c) H&E stain of Metastasis\_6D. (d) Axial chest CT showing distant metastases to right middle lobe. (e) H&E stain of Metastasis\_4A. (c) H&E stain of Metastasis\_4H. (g) Axial chest CT showing distant metastases to right lower lobe. (h) H&E stain of Metastasis\_4J. (i) H&E stain of Metastasis\_2B.

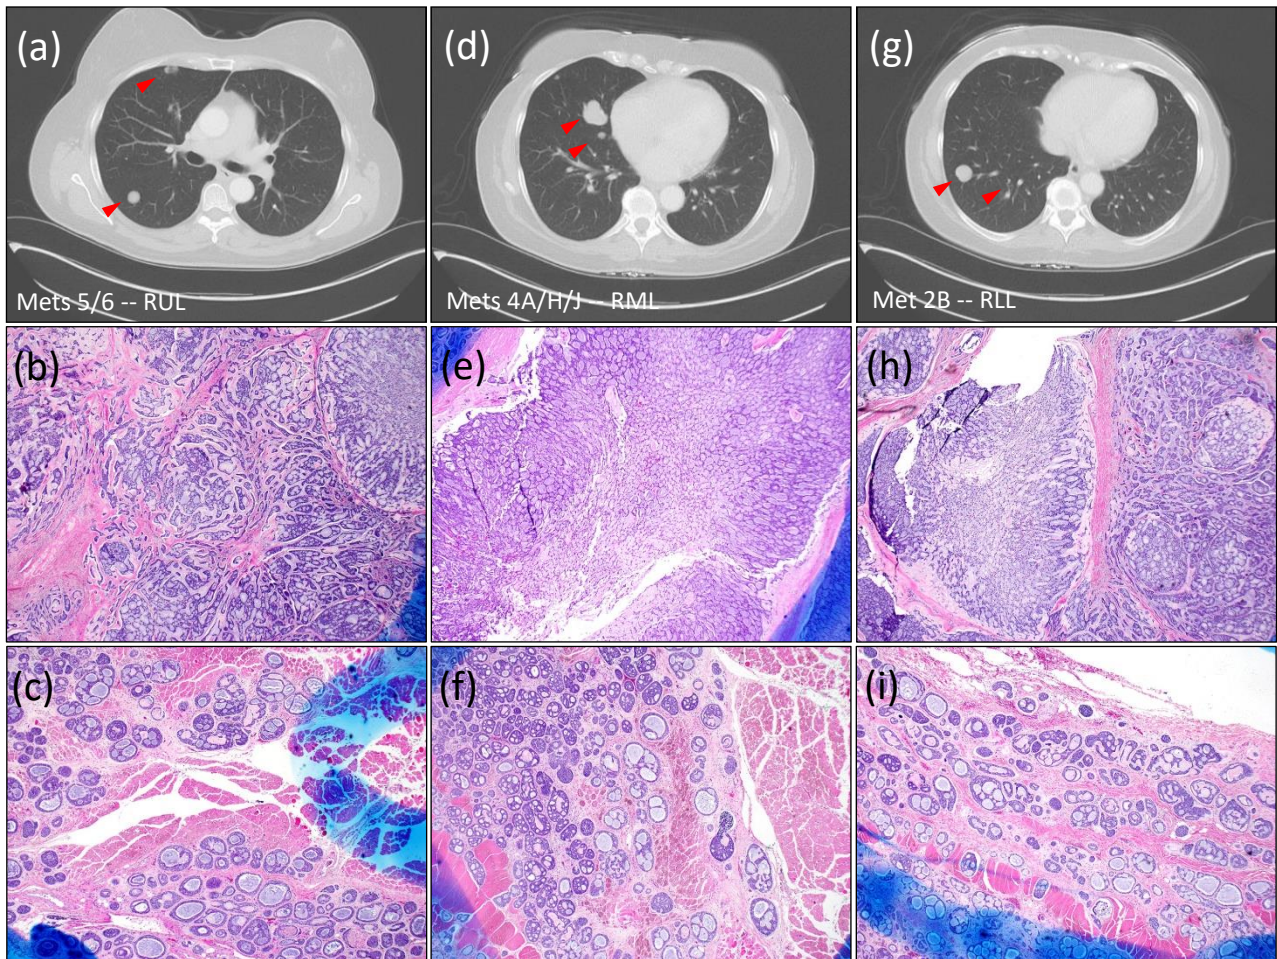

**Figure S8.** Fluorescence in situ hybridization (FISH) of distant lung metastatic lesions in a single case of parotid adenoid cystic carcinoma. All samples demonstrated retention of *MYB-NFIB* fusion events. FISH was performed using a three-color probe mix where green represents 5' *MYB*, orange represents 3' *MYB*, and red represents 3' *NFIB* transcripts. White arrowheads point to colocalized probes, consistent with classic *MYB-NFIB* translocation. (a). Metastatic lesion 2B. (b). Metastatic lesion 4H. (c). Metastatic lesion 4I. (d). Metastatic lesion 5C. (e). Metastatic lesion 5E. (f). Metastatic lesion 6D.

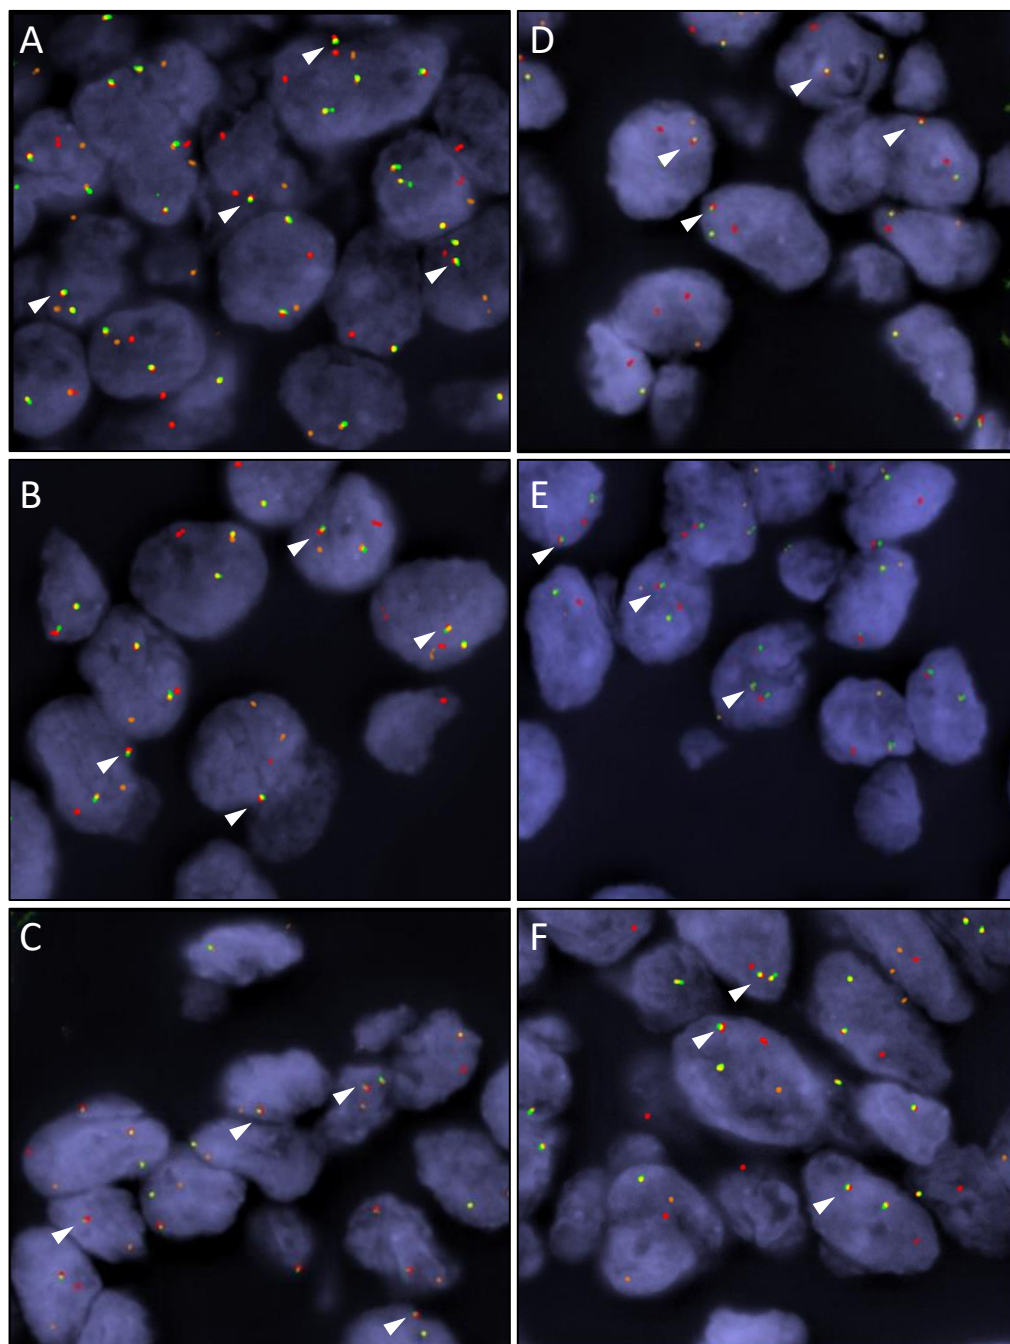

**Figure S9.** Two-way plots of cancer cell fraction in a single case of parotid adenoid cystic carcinoma, comparing primary tumor with eight metastatic lesions. Subgroups stratified by non-negative matrix factorization (NMF) clustering via GenePattern.

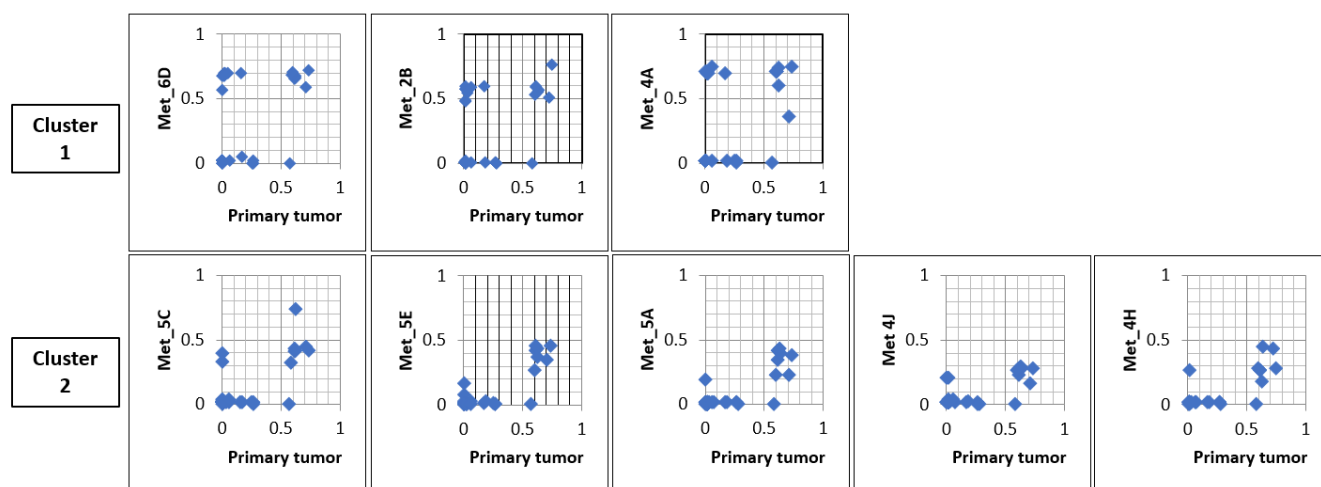

**Figure S10.** Multiregion clonal evolution heatmap analysis of two breast adenoid cystic carcinoma cases with transformation to high grade triple-negative breast cancer (TNBC) histology. Both cases exhibited the *MYB-NFIB* translocation throughout all multiregions analyzed. Clonality represented by cancer cell fraction in red.

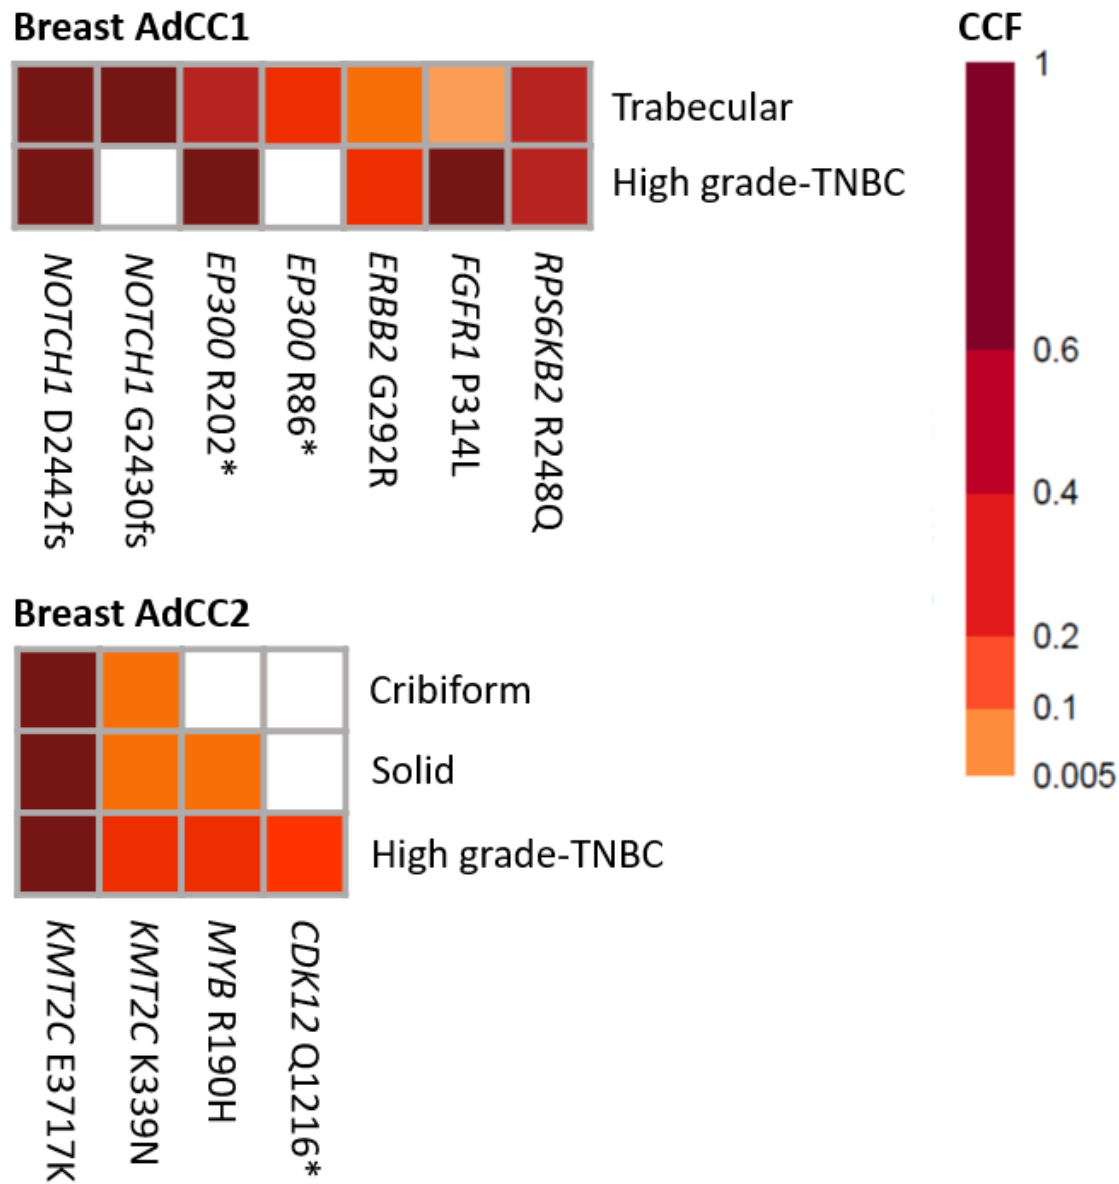

**Table S1.** Study distribution of primary and recurrent/metastatic (R/M) adenoid cystic carcinoma (ACC) cases. Mixed entails head and neck, lung, and breast disease sites. H&N, head and neck; WES, whole exome sequencing; WGS, whole genome sequencing; FFPE, formalin fixed paraffin embedded.

| Primary ACC Studies                       | Institution              | Site   | Approach | Tissue            | Matched Normal? | # Samples |
|-------------------------------------------|--------------------------|--------|----------|-------------------|-----------------|-----------|
| Ho et al, <i>Nature Genetics</i> 2013     | Memorial Sloan Kettering | H&N    | WES/WGS  | Fresh frozen      | Yes             | 60        |
| Stephens et al, <i>J Clin Invest</i> 2013 | Sanger/MD Anderson       | H&N    | WES      | Fresh frozen      | Yes             | 24        |
| Martelotto et al, <i>J Path</i> 2015      | Memorial Sloan Kettering | Breast | WES      | Fresh frozen/FFPE | Yes             | 12        |
| Rettig et al, <i>Cancer Prev Res</i> 2016 | Johns Hopkins            | H&N    | WGS      | Fresh frozen      | Yes             | 25        |
| Mitani et al, <i>Clin Cancer Res</i> 2016 | MD Anderson              | H&N    | WGS      | Fresh frozen      | Yes             | 21        |
| [Sanger/MD Anderson - unpublished]        | Sanger/MD Anderson       | H&N    | WES      | Fresh frozen      | Yes             | 35        |

**Total**

**177**

| Recurrent/Metastatic ACC Studies       | Institution              | Site  | Approach        | Tissue       | Matched Normal? | # Samples |
|----------------------------------------|--------------------------|-------|-----------------|--------------|-----------------|-----------|
| Ross et al, <i>Am J Surg Path</i> 2014 | Foundation Medicine      | H&N   | Targeted panels | FFPE         | No              | 28        |
| [MSKCC - unpublished]                  | Memorial Sloan Kettering | H&N   | WES             | Fresh frozen | Yes             | 16        |
| [MSK-IMPACT - unpublished]             | Memorial Sloan Kettering | Mixed | Targeted panels | FFPE         | Yes             | 94        |
| [Foundation Medicine - unpublished]    | Foundation Medicine      | Mixed | Targeted panels | FFPE         | No              | 730       |

**Total**

**868**

**Table S2.** Top gene alteration incidence by tumor site (includes primary and recurrent/metastatic cases).

| Salivary      |               |           | Lung          |               |           | Breast        |               |           |
|---------------|---------------|-----------|---------------|---------------|-----------|---------------|---------------|-----------|
| Gene          | # Alterations | Incidence | Gene          | # Alterations | Incidence | Gene          | # Alterations | Incidence |
| <i>MYB</i>    | 203           | 25.2%     | <i>MYB</i>    | 12            | 20.3%     | <i>MYB</i>    | 14            | 37.5%     |
| <i>NOTCH1</i> | 323           | 21.8%     | <i>NOTCH1</i> | 16            | 17.1%     | <i>NFIB</i>   | 12            | 31.5%     |
| <i>NFIB</i>   | 211           | 20.8%     | <i>KMT2C</i>  | 16            | 17.0%     | <i>NOTCH1</i> | 11            | 21.1%     |
| <i>KDM6A</i>  | 138           | 12.9%     | <i>BCOR</i>   | 13            | 16.0%     | <i>CREBBP</i> | 8             | 18.9%     |
| <i>ARID1A</i> | 123           | 10.7%     | <i>ARID1A</i> | 14            | 15.8%     | <i>KMT2D</i>  | 7             | 16.2%     |
| <i>KMT2C</i>  | 103           | 10.7%     | <i>ARID1B</i> | 10            | 15.3%     | <i>MED12</i>  | 5             | 13.5%     |
| <i>KMT2D</i>  | 120           | 10.5%     | <i>NFIB</i>   | 9             | 11.8%     | <i>FAT3</i>   | 6             | 11.4%     |
| <i>BCOR</i>   | 103           | 10.2%     | <i>FAT1</i>   | 7             | 10.2%     | <i>KMT2C</i>  | 5             | 9.4%      |
| <i>ARID1B</i> | 74            | 9.2%      | <i>CREBBP</i> | 8             | 9.3%      | <i>ARID1B</i> | 3             | 9.4%      |
| <i>CREBBP</i> | 96            | 8.9%      | <i>KMT2D</i>  | 8             | 9.3%      | <i>LRP1B</i>  | 3             | 8.3%      |
| <i>TERT</i>   | 76            | 7.5%      | <i>LRP1B</i>  | 11            | 9.3%      | <i>NOTCH3</i> | 3             | 8.1%      |
| <i>EP300</i>  | 76            | 7.4%      | <i>TP53</i>   | 10            | 9.2%      | <i>SF3B1</i>  | 3             | 8.1%      |
| <i>RUNX1</i>  | 75            | 6.8%      | <i>MED12</i>  | 6             | 8.0%      | <i>ARID1A</i> | 3             | 7.9%      |
| <i>FAT1</i>   | 54            | 6.7%      | <i>TERT</i>   | 6             | 7.9%      | <i>KDM6A</i>  | 3             | 7.9%      |
| <i>TP53</i>   | 84            | 6.6%      | <i>KDM6A</i>  | 6             | 7.9%      | <i>PTEN</i>   | 4             | 7.9%      |
| <i>SPEN</i>   | 73            | 6.5%      | <i>TSC2</i>   | 6             | 7.9%      | <i>KMT2A</i>  | 3             | 7.9%      |
| <i>BRCA2</i>  | 59            | 5.9%      | <i>SPEN</i>   | 6             | 6.7%      | <i>TP53</i>   | 3             | 7.9%      |
| <i>ATM</i>    | 62            | 5.7%      | <i>EP300</i>  | 5             | 6.7%      | <i>CHD2</i>   | 2             | 6.7%      |
| <i>PIK3CA</i> | 52            | 5.1%      | <i>NOTCH2</i> | 5             | 6.7%      | <i>BCORL1</i> | 2             | 5.7%      |
| <i>PIK3R1</i> | 50            | 4.7%      | <i>PTPN11</i> | 5             | 6.6%      | <i>CHEK2</i>  | 2             | 5.3%      |

**Table S3.** Top gene alteration incidence of recurrent/metastatic adenoid cystic carcinoma (R/M ACC) cases comparing primary site with distant metastatic site.

| R/M Cohort (primary tumor) |       |   |        | R/M Cohort (metastatic tumor) |       |    |        |
|----------------------------|-------|---|--------|-------------------------------|-------|----|--------|
| Gene                       | # Mut | # | Freq   | Gene                          | # Mut | #  | Freq   |
| <i>NOTCH1</i>              | 10    | 7 | 23.33% | <i>NFIB</i>                   | 20    | 20 | 29.41% |
| <i>NFIB</i>                | 6     | 6 | 20%    | <i>MYB</i>                    | 20    | 20 | 29.41% |
| <i>KDM6A</i>               | 6     | 6 | 20%    | <i>NOTCH1</i>                 | 25    | 19 | 27.94% |
| <i>MYB</i>                 | 6     | 6 | 20%    | <i>TERT</i>                   | 13    | 13 | 19.12% |
| <i>ARID1A</i>              | 5     | 5 | 16.67% | <i>BCOR</i>                   | 9     | 9  | 13.24% |
| <i>BCOR</i>                | 4     | 4 | 13.33% | <i>KDM6A</i>                  | 8     | 8  | 11.76% |
| <i>TERT</i>                | 4     | 4 | 13.33% | <i>TP53</i>                   | 9     | 8  | 11.76% |
| <i>PIK3CA</i>              | 4     | 4 | 13.33% | <i>ARID1A</i>                 | 7     | 6  | 8.82%  |
| <i>TP53</i>                | 3     | 3 | 10%    | <i>KMT2D</i>                  | 5     | 5  | 7.35%  |
| <i>RUNX1</i>               | 2     | 2 | 6.67%  | <i>PIK3CA</i>                 | 5     | 5  | 7.35%  |
| <i>CREBBP</i>              | 2     | 2 | 6.67%  | <i>EP300</i>                  | 5     | 5  | 7.35%  |
| <i>KMT2C</i>               | 2     | 2 | 6.67%  | <i>RUNX1</i>                  | 7     | 4  | 5.88%  |
| <i>PPP2R1A</i>             | 2     | 2 | 6.67%  | <i>MGA</i>                    | 4     | 4  | 8.16%  |
| <i>MTOR</i>                | 2     | 2 | 6.67%  | <i>ABL1</i>                   | 3     | 3  | 4.41%  |
| <i>HRAS</i>                | 2     | 2 | 6.67%  | <i>RASA1</i>                  | 3     | 3  | 4.41%  |
| <i>SMARCA4</i>             | 2     | 2 | 6.67%  | <i>IGF1R</i>                  | 3     | 3  | 4.41%  |
| <i>FGFR2</i>               | 2     | 2 | 6.67%  | <i>PTPRD</i>                  | 4     | 3  | 4.41%  |
| <i>TBX3</i>                | 1     | 1 | 3.33%  | <i>BRCA2</i>                  | 3     | 3  | 4.41%  |
| <i>RARA</i>                | 1     | 1 | 3.33%  | <i>ATM</i>                    | 3     | 3  | 4.41%  |
| <i>ATRX</i>                | 1     | 1 | 3.33%  | <i>SPEN</i>                   | 3     | 3  | 4.41%  |

**Table S4.** Odds ratios for top altered genes comparing primary with recurrent/metastatic (R/M) adenoid cystic carcinoma (ACC) cohorts. Nominal p-values and Benjamini-Hochberg false discovery rate (FDR)-adjusted q values are shown. \*, Given that the gene panels differed for the 868 R/M cases, the denominator underlying mutation incidence is specific for each gene.

| Gene              | Primary ACC (n=177) |           | R/M ACC (n=868*) |           | Odds ratio | 95% CI     | p-value | BenHoch q-value |
|-------------------|---------------------|-----------|------------------|-----------|------------|------------|---------|-----------------|
|                   | # alterations       | Incidence | # alterations    | Incidence |            |            |         |                 |
| <i>NOTCH1</i>     | 15                  | 8.5%      | 225              | 26.3%     | 3.86       | 2.23-6.70  | <0.0001 | 0.0006          |
| <i>KDM6A</i>      | 6                   | 3.4%      | 130              | 15.2%     | 5.12       | 2.22-11.80 | 0.0001  | 0.0006          |
| <i>MLL3/KMT2C</i> | 7                   | 4.0%      | 90               | 14.3%     | 4.06       | 1.84-8.92  | 0.0005  | 0.0012          |
| <i>ARID1B</i>     | 7                   | 4.0%      | 89               | 14.1%     | 4.00       | 1.82-8.81  | 0.0006  | 0.0012          |
| <i>ARID1A</i>     | 4                   | 2.3%      | 117              | 13.7%     | 6.87       | 2.50-18.86 | 0.0002  | 0.0006          |
| <i>BCOR</i>       | 3                   | 1.7%      | 107              | 13.3%     | 8.92       | 2.80-28.42 | 0.0002  | 0.0006          |
| <i>MLL2/KMT2D</i> | 8                   | 4.5%      | 103              | 12.8%     | 3.10       | 1.48-6.50  | 0.0027  | 0.0046          |
| <i>CREBBP</i>     | 8                   | 4.5%      | 89               | 11.1%     | 2.63       | 1.25-5.53  | 0.011   | 0.013           |
| <i>EP300</i>      | 5                   | 2.8%      | 73               | 9.1%      | 3.44       | 1.37-8.64  | 0.0086  | 0.013           |
| <i>RUNX1</i>      | 5                   | 2.8%      | 68               | 8.0%      | 2.98       | 1.18-7.49  | 0.021   | 0.021           |
| <i>LRP1B</i>      | 2                   | 1.1%      | 51               | 6.8%      | 6.43       | 1.55-26.67 | 0.010   | 0.013           |
| <i>ATM</i>        | 3                   | 1.7%      | 56               | 6.8%      | 4.22       | 1.31-13.63 | 0.016   | 0.017           |

**Table S5.** Variant allele fraction (VAF) for most commonly mutated genes in recurrent/metastatic adenoid cystic carcinoma (R/M ACC).

**R/M ACC Cases**

| Key genes         | # point mutations | Average VAF | # cases w/VAF <0.05 | % cases w/VAF <0.05 |
|-------------------|-------------------|-------------|---------------------|---------------------|
| <i>NOTCH1</i>     | 337               | 0.36        | 12                  | 3.6%                |
| <i>KDM6A</i>      | 141               | 0.41        | 0                   | 0.0%                |
| <i>ARID1A</i>     | 136               | 0.32        | 4                   | 2.9%                |
| <i>MLL2/KMT2D</i> | 125               | 0.36        | 0                   | 0.0%                |
| <i>BCOR</i>       | 116               | 0.39        | 0                   | 0.0%                |
| <i>MLL3/KMT2C</i> | 115               | 0.29        | 1                   | 0.9%                |
| <i>CREBBP</i>     | 102               | 0.29        | 5                   | 4.9%                |
| <i>ARID1B</i>     | 85                | 0.37        | 0                   | 0.0%                |
| <i>TERT</i>       | 83                | 0.37        | 0                   | 0.0%                |
| <i>EP300</i>      | 77                | 0.30        | 2                   | 2.6%                |
| <i>RUNX1</i>      | 73                | 0.25        | 3                   | 4.1%                |
| <i>ATM</i>        | 63                | 0.35        | 3                   | 4.8%                |
| <i>LRP1B</i>      | 57                | 0.44        | 1                   | 1.8%                |
| <i>NOTCH3</i>     | 47                | 0.42        | 0                   | 0.0%                |
| <i>NOTCH2</i>     | 37                | 0.39        | 1                   | 2.7%                |
| <i>NOTCH4</i>     | 27                | 0.43        | 0                   | 0.0%                |

**Table S6.** Downsampling analysis of R/M MSKCC-IMPACT cohort. Five independently downsampled BAM files generated at 100x coverage (original BAM files at 600x), with reads randomly selected during downsampling. Only one mutation (red highlight) did not pass filters and would have been missed at 100x coverage.

| DMP_ID           | Gene          | Total depth | Alt Depth | IMPACT VAF     | Downsampled BAM1 VAF | Downsampled BAM2 VAF | Downsampled BAM3 VAF | Downsampled BAM4 VAF | Downsampled BAM5 VAF | Downsampled BAM Ave VAF |
|------------------|---------------|-------------|-----------|----------------|----------------------|----------------------|----------------------|----------------------|----------------------|-------------------------|
| P0006690-T01-IM5 | MLL2          | 93          | 36        | 0.3871         | 0.47059              | 0.41463              | 0.34884              | 0.35294              | 0.35                 | 0.3874                  |
| P0011474-T01-IM5 | BCOR          | 876         | 698       | 0.7968         | 0.76786              | 0.81967              | 0.875                | 0.76271              | 0.92647              | 0.830342                |
| P0014709-T01-IM6 | ATM           | 736         | 57        | 0.07745        | 0.07595              | 0.08824              | 0.07042              | 0.03947              | 0.04938              | 0.064692                |
| P0012051-T01-IM5 | ARID1A        | 801         | 75        | 0.09363        | 0.17333              | 0.08421              | 0.10145              | 0.05172              | 0.0625               | 0.094642                |
| P0011474-T01-IM5 | EP300         | 987         | 229       | 0.23202        | 0.23077              | 0.3271               | 0.2126               | 0.23656              | 0.30337              | 0.26208                 |
| P0009457-T01-IM5 | ARID1A        | 977         | 686       | 0.70215        | 0.69565              | 0.63636              | 0.63551              | 0.69697              | 0.80435              | 0.693768                |
| P0000790-T01-IM3 | RUNX1         | 221         | 47        | 0.21267        | 0.18667              | 0.26761              | 0.22973              | 0.35135              | 0.27778              | 0.262628                |
| P0011474-T01-IM5 | RUNX1         | 218         | 18        | 0.08257        | 0.09859              | 0.06944              | 0.09375              | 0.11268              | 0.10145              | 0.095182                |
| P0011474-T01-IM5 | NOTCH1        | 156         | 69        | 0.44231        | 0.56522              | 0.53571              | 0.32653              | 0.2963               | 0.51786              | 0.448324                |
| P0001201-T01-IM3 | BCOR          | 607         | 219       | 0.36079        | 0.35294              | 0.42308              | 0.32381              | 0.31034              | 0.42727              | 0.367488                |
| P0014472-T01-IM6 | NOTCH1        | 321         | 93        | 0.28972        | 0.40698              | 0.37333              | 0.3956               | 0.32911              | 0.32                 | 0.365004                |
| P0013084-T01-IM5 | NOTCH1        | 371         | 147       | 0.39623        | 0.43038              | 0.35106              | 0.46237              | 0.36709              | 0.51765              | 0.42571                 |
| P0000623-T01-IM3 | RUNX1         | 191         | 13        | 0.06806        | 0.07143              | 0.04255              | 0.13793              | 0.12069              | 0.02083              | 0.078686                |
| P0012051-T01-IM5 | EP300         | 802         | 292       | 0.36409        | 0.34286              | 0.39024              | 0.26027              | 0.27381              | 0.44186              | 0.341808                |
| P0001422-T01-IM3 | ARID1B        | 906         | 446       | 0.49227        | 0.45455              | 0.45631              | 0.40789              | 0.39048              | 0.55789              | 0.453424                |
| P0014472-T01-IM6 | NOTCH1        | 833         | 334       | 0.40096        | 0.5                  | 0.55789              | 0.4881               | 0.53333              | 0.40698              | 0.49726                 |
| P0014382-T01-IM6 | NOTCH1        | 1198        | 498       | 0.41569        | 0.46226              | 0.48855              | 0.39837              | 0.4661               | 0.45631              | 0.454318                |
| P0000980-T01-IM3 | NOTCH1        | 102         | 56        | 0.54902        | 0.48649              | 0.44828              | 0.51724              | 0.46154              | 0.57692              | 0.498094                |
| P0009317-T02-IM5 | NOTCH1        | 143         | 90        | 0.62937        | 0.63889              | 0.4918               | 0.7                  | 0.73171              | 0.58                 | 0.62848                 |
| P0014382-T01-IM6 | BCOR          | 228         | 76        | 0.33333        | 0.41791              | 0.35593              | 0.25                 | 0.3125               | 0.42029              | 0.351326                |
| P0002214-T01-IM3 | MLL3          | 246         | 19        | 0.07724        | 0.13462              | 0.02564              | 0.13514              | 0.13158              | 0.14                 | 0.113396                |
| P0000948-T01-IM3 | <b>NOTCH1</b> | <b>375</b>  | <b>20</b> | <b>0.05333</b> | 0.01562              | 0                    | 0.05797              | 0.05634              | 0.06944              | 0.039874                |
| P0014709-T01-IM6 | BCOR          | 276         | 196       | 0.71014        | 0.75                 | 0.76562              | 0.75                 | 0.70175              | 0.75472              | 0.744418                |
| P0014709-T01-IM6 | ATM           | 480         | 159       | 0.33125        | 0.37255              | 0.33333              | 0.35461              | 0.31507              | 0.36                 | 0.347112                |
| P0011474-T01-IM5 | ARID1A        | 211         | 123       | 0.58294        | 0.59091              | 0.57353              | 0.60811              | 0.53226              | 0.625                | 0.585962                |
| P0002486-T01-IM3 | NOTCH1        | 284         | 111       | 0.39085        | 0.32258              | 0.3                  | 0.27473              | 0.36923              | 0.36364              | 0.326036                |
| P0001585-T01-IM3 | NOTCH1        | 101         | 23        | 0.22772        | 0.24242              | 0.32143              | 0.15625              | 0.15909              | 0.23529              | 0.222896                |
| P0014709-T01-IM6 | KDM6A         | 381         | 152       | 0.39895        | 0.38318              | 0.47273              | 0.42623              | 0.37624              | 0.41803              | 0.415282                |
| P0012652-T01-IM5 | KDM6A         | 1065        | 299       | 0.28075        | 0.27273              | 0.32381              | 0.31061              | 0.2193               | 0.20472              | 0.266234                |
| P0000340-T01-IM3 | BCOR          | 504         | 302       | 0.59921        | 0.48                 | 0.64151              | 0.45714              | 0.57447              | 0.76667              | 0.583958                |
| P0008688-T01-IM5 | RUNX1         | 777         | 277       | 0.3565         | 0.31122              | 0.32618              | 0.4                  | 0.3299               | 0.36715              | 0.34689                 |

R/M Adenoid Cystic Carcinoma  
Supplemental Figures/Tables  
Ho et al – 18

|                  |        |      |     |         |         |         |         |         |         |          |
|------------------|--------|------|-----|---------|---------|---------|---------|---------|---------|----------|
| P0001451-T01-IM3 | KDM6A  | 261  | 33  | 0.12644 | 0.12712 | 0.18182 | 0.13889 | 0.128   | 0.14851 | 0.144868 |
| P0008768-T01-IM5 | ARID1A | 132  | 38  | 0.28788 | 0.46429 | 0.53333 | 0.6087  | 0.65217 | 0.56    | 0.563698 |
| P0000340-T01-IM3 | NOTCH1 | 199  | 69  | 0.34673 | 0.31707 | 0.42857 | 0.27586 | 0.28889 | 0.38095 | 0.338268 |
| P0006518-T01-IM5 | KDM6A  | 412  | 232 | 0.56311 | 0.61446 | 0.53247 | 0.62162 | 0.53488 | 0.53488 | 0.567662 |
| P0000507-T01-IM3 | RUNX1  | 511  | 27  | 0.05284 | 0.05455 | 0.02985 | 0.07692 | 0.11864 | 0.03448 | 0.062888 |
| P0001201-T01-IM3 | RUNX1  | 869  | 172 | 0.19793 | 0.13095 | 0.15    | 0.27193 | 0.17757 | 0.20792 | 0.187674 |
| P0010663-T01-IM5 | RUNX1  | 699  | 91  | 0.13019 | 0.17722 | 0.15714 | 0.11538 | 0.14607 | 0.15584 | 0.15033  |
| P0001422-T01-IM3 | EP300  | 949  | 147 | 0.1549  | 0.14286 | 0.1039  | 0.10204 | 0.18812 | 0.1913  | 0.145644 |
| P0017600-T01-IM5 | MLL2   | 622  | 46  | 0.07395 | 0.05983 | 0.11    | 0.06087 | 0.11111 | 0.05941 | 0.080244 |
| P0000792-T01-IM3 | NOTCH1 | 725  | 164 | 0.22621 | 0.31452 | 0.27679 | 0.25    | 0.19828 | 0.2619  | 0.260298 |
| P0005624-T02-IM5 | BCOR   | 761  | 265 | 0.34823 | 0.36066 | 0.30693 | 0.36134 | 0.35    | 0.34513 | 0.344812 |
| P0007499-T01-IM5 | MLL2   | 395  | 190 | 0.48101 | 0.51724 | 0.39474 | 0.59524 | 0.47458 | 0.54545 | 0.50545  |
| P0002486-T01-IM3 | KDM6A  | 844  | 700 | 0.82938 | 0.9322  | 0.92784 | 0.83784 | 0.90291 | 0.90566 | 0.90129  |
| P0002486-T01-IM3 | NOTCH1 | 684  | 473 | 0.69152 | 0.64423 | 0.73333 | 0.7125  | 0.62338 | 0.71717 | 0.686122 |
| P0001585-T01-IM3 | BCOR   | 252  | 173 | 0.68651 | 0.65625 | 0.5     | 0.71429 | 0.65    | 0.70968 | 0.646044 |
| P0001451-T01-IM3 | CREBBP | 146  | 23  | 0.15753 | 0.13699 | 0.22807 | 0.2     | 0.19753 | 0.15625 | 0.183768 |
| P0007499-T01-IM5 | NOTCH1 | 123  | 36  | 0.29268 | 0.34545 | 0.24561 | 0.31148 | 0.27273 | 0.28571 | 0.292196 |
| P0013838-T01-IM5 | NOTCH1 | 160  | 49  | 0.30625 | 0.31395 | 0.31707 | 0.33735 | 0.24444 | 0.27536 | 0.297634 |
| P0000618-T01-IM3 | NOTCH1 | 1140 | 894 | 0.78421 | 0.77612 | 0.76496 | 0.73478 | 0.75336 | 0.85306 | 0.776456 |
| P0005392-T01-IM5 | ARID1A | 788  | 323 | 0.4099  | 0.43902 | 0.45946 | 0.5098  | 0.44118 | 0.38889 | 0.44767  |
| P0007145-T01-IM5 | ARID1A | 675  | 266 | 0.39407 | 0.42718 | 0.40678 | 0.36029 | 0.45161 | 0.39695 | 0.408562 |
| P0001201-T01-IM3 | EP300  | 700  | 276 | 0.39429 | 0.38542 | 0.328   | 0.39516 | 0.36082 | 0.47541 | 0.388962 |
| P0000434-T01-IM3 | NOTCH1 | 607  | 454 | 0.74794 | 0.81013 | 0.73034 | 0.76289 | 0.65591 | 0.72277 | 0.736408 |
| P0001451-T01-IM3 | BCOR   | 586  | 242 | 0.41297 | 0.44681 | 0.42268 | 0.42593 | 0.36842 | 0.53623 | 0.440014 |
| P0003649-T01-IM5 | KDM6A  | 1756 | 418 | 0.23804 | 0.22798 | 0.29353 | 0.2201  | 0.27273 | 0.27273 | 0.257414 |
| P0000623-T02-IM5 | ARID1A | 549  | 208 | 0.37887 | 0.38686 | 0.40789 | 0.37589 | 0.3662  | 0.45    | 0.397368 |
| P0000374-T01-IM3 | KDM6A  | 462  | 34  | 0.07359 | 0.09735 | 0.08257 | 0.09322 | 0.07826 | 0.12069 | 0.094418 |
| P0015401-T01-IM6 | ARID1A | 497  | 169 | 0.34004 | 0.33051 | 0.35606 | 0.32593 | 0.36879 | 0.3871  | 0.353678 |
| P0000340-T01-IM3 | BCOR   | 670  | 336 | 0.50149 | 0.53922 | 0.44118 | 0.39423 | 0.56098 | 0.46429 | 0.47998  |
| P0003327-T01-IM5 | NOTCH1 | 651  | 78  | 0.11982 | 0.06667 | 0.10744 | 0.15789 | 0.15556 | 0.06306 | 0.110124 |
| P0003056-T01-IM5 | BCOR   | 497  | 249 | 0.50101 | 0.66667 | 0.69444 | 0.73134 | 0.71831 | 0.59211 | 0.680574 |
| P0014961-T01-IM6 | RUNX1  | 165  | 37  | 0.22424 | 0.21296 | 0.21239 | 0.23577 | 0.24    | 0.21138 | 0.2225   |
| P0000623-T01-IM3 | ARID1A | 150  | 23  | 0.15333 | 0.1875  | 0.38462 | 0.36    | 0.52    | 0.16667 | 0.323758 |
| P0014961-T01-IM6 | BCOR   | 886  | 73  | 0.08239 | 0.13768 | 0.152   | 0.18045 | 0.25333 | 0.2129  | 0.187272 |
| P0001451-T01-IM3 | RUNX1  | 635  | 79  | 0.12441 | 0.11765 | 0.14563 | 0.11765 | 0.09184 | 0.16814 | 0.128182 |

R/M Adenoid Cystic Carcinoma  
Supplemental Figures/Tables  
Ho et al – 19

|                  |        |      |      |         |         |         |         |         |         |          |
|------------------|--------|------|------|---------|---------|---------|---------|---------|---------|----------|
| P0000374-T01-IM3 | NOTCH1 | 1347 | 1102 | 0.81811 | 0.84615 | 0.79545 | 0.84932 | 0.72159 | 0.79141 | 0.800784 |
| P0015101-T01-IM6 | NOTCH1 | 1416 | 680  | 0.48023 | 0.49091 | 0.49405 | 0.46707 | 0.44693 | 0.42778 | 0.465348 |
| P0014961-T01-IM6 | MLL2   | 506  | 183  | 0.36166 | 0.46154 | 0.35135 | 0.37975 | 0.34286 | 0.34444 | 0.375988 |
| P0001422-T01-IM3 | NOTCH1 | 318  | 177  | 0.5566  | 0.49091 | 0.7234  | 0.4     | 0.46512 | 0.48333 | 0.512552 |
| P0007145-T01-IM5 | KDM6A  | 779  | 218  | 0.27985 | 0.23457 | 0.2381  | 0.24286 | 0.33333 | 0.3     | 0.269772 |
| P0007145-T01-IM5 | ATM    | 774  | 68   | 0.08786 | 0.15714 | 0.07246 | 0.12195 | 0.1     | 0.06098 | 0.102506 |
| P0004371-T01-IM5 | KDM6A  | 689  | 63   | 0.09144 | 0.075   | 0.07895 | 0.08451 | 0.06557 | 0.10448 | 0.081702 |
| P0013838-T01-IM5 | NOTCH1 | 951  | 365  | 0.38381 | 0.28571 | 0.31496 | 0.36752 | 0.38519 | 0.34188 | 0.339052 |
| P0006032-T01-IM5 | KDM6A  | 465  | 392  | 0.84301 | 0.83673 | 0.81818 | 0.7971  | 0.87179 | 0.8     | 0.82476  |
| P0016400-T01-IM6 | KDM6A  | 293  | 181  | 0.61775 | 0.55769 | 0.62069 | 0.57143 | 0.72857 | 0.64474 | 0.624624 |
| P0007145-T01-IM5 | ATM    | 391  | 24   | 0.06138 | 0.03448 | 0.08571 | 0.05769 | 0.05882 | 0.05    | 0.05734  |
| P0000524-T01-IM3 | MLL2   | 166  | 13   | 0.07831 | 0.13636 | 0.09091 | 0       | 0.05556 | 0.11765 | 0.080096 |
| P0000202-T01-IM3 | MLL3   | 1145 | 69   | 0.06026 | 0.09722 | 0.05806 | 0.10317 | 0.02857 | 0.04444 | 0.066292 |
| P0003327-T01-IM5 | NOTCH1 | 858  | 154  | 0.17949 | 0.14953 | 0.18487 | 0.13187 | 0.16304 | 0.24444 | 0.17475  |
| P0000618-T01-IM3 | BCOR   | 598  | 58   | 0.09699 | 0.03333 | 0.10989 | 0.07812 | 0.08333 | 0.08989 | 0.078912 |
| P0000618-T01-IM3 | NOTCH1 | 602  | 58   | 0.09635 | 0.10526 | 0.04225 | 0.04918 | 0.11842 | 0.12281 | 0.087584 |
| P0012652-T01-IM5 | CREBBP | 916  | 420  | 0.45852 | 0.45882 | 0.53097 | 0.42574 | 0.50877 | 0.47368 | 0.479596 |
| P0007499-T01-IM5 | NOTCH1 | 731  | 178  | 0.2435  | 0.15476 | 0.24051 | 0.28571 | 0.36264 | 0.24286 | 0.257296 |
| P0009174-T01-IM5 | ARID1A | 1133 | 320  | 0.28244 | 0.35211 | 0.29323 | 0.27273 | 0.21429 | 0.27152 | 0.280776 |
| P0001451-T01-IM3 | ARID1B | 864  | 267  | 0.30903 | 0.31868 | 0.39604 | 0.37895 | 0.21495 | 0.34615 | 0.330954 |
| P0007849-T02-IM5 | KDM6A  | 533  | 305  | 0.57223 | 0.55385 | 0.60294 | 0.56452 | 0.5873  | 0.60294 | 0.58231  |
| P0000524-T01-IM3 | NOTCH1 | 1277 | 276  | 0.21613 | 0.24812 | 0.22137 | 0.21094 | 0.18898 | 0.24818 | 0.223518 |
| P0012563-T01-IM5 | NOTCH1 | 1188 | 211  | 0.17761 | 0.24812 | 0.19841 | 0.23188 | 0.12698 | 0.176   | 0.196278 |
| P0000980-T01-IM3 | NOTCH1 | 845  | 590  | 0.69822 | 0.65476 | 0.72941 | 0.70423 | 0.72043 | 0.69149 | 0.700064 |
| P0012563-T01-IM5 | KDM6A  | 729  | 465  | 0.63786 | 0.5     | 0.69565 | 0.62687 | 0.36842 | 0.66234 | 0.570656 |
| P0008066-T01-IM5 | BCOR   | 521  | 32   | 0.06142 | 0.11594 | 0.08642 | 0.02667 | 0.05495 | 0.06522 | 0.06984  |
| P0012652-T01-IM5 | NOTCH1 | 733  | 213  | 0.29059 | 0.27778 | 0.34722 | 0.35366 | 0.37931 | 0.30233 | 0.33206  |
| P0014961-T01-IM6 | NOTCH1 | 819  | 369  | 0.45055 | 0.54054 | 0.41975 | 0.50685 | 0.42391 | 0.44444 | 0.467098 |
| P0006690-T01-IM5 | CREBBP | 1952 | 246  | 0.12602 | 0.13298 | 0.14205 | 0.09787 | 0.11312 | 0.09205 | 0.115614 |
| P0014405-T01-IM6 | KDM6A  | 1023 | 123  | 0.12023 | 0.0885  | 0.1028  | 0.09474 | 0.14516 | 0.09615 | 0.10547  |
| P0004371-T01-IM5 | EP300  | 902  | 257  | 0.28492 | 0.24706 | 0.30208 | 0.23529 | 0.27397 | 0.25806 | 0.263292 |
| P0005392-T01-IM5 | NOTCH1 | 696  | 635  | 0.91236 | 0.93162 | 0.89362 | 0.90741 | 0.91667 | 0.93636 | 0.917136 |
| P0010654-T01-IM5 | ARID1A | 425  | 93   | 0.21882 | 0.33036 | 0.15152 | 0.24771 | 0.25    | 0.232   | 0.242318 |
| P0000202-T01-IM3 | NOTCH1 | 622  | 222  | 0.35691 | 0.31481 | 0.40909 | 0.38889 | 0.4     | 0.36646 | 0.37585  |
| P0019072-T01-IM6 | NOTCH1 | 533  | 118  | 0.22139 | 0.17857 | 0.21477 | 0.27642 | 0.22901 | 0.20968 | 0.22169  |

**Table S7.** Pyclone subclonal population analysis of 58 adenoid cystic carcinoma patients. A tumor was considered subclonal if it comprised at least 2 clusters (each with a minimum of 2 mutations), with at least one cluster having an upper 95% confidence interval (CI) below 0.95. SCP, subclonal population.

| ID       | Cohort  | Subclonal? | # SCP | # Clusters | Upper bound 95% CI |
|----------|---------|------------|-------|------------|--------------------|
| 05_6986  | Primary | yes        | 2     | 2 clusters | 0.61               |
| 06_2532  | Primary | no         |       | 2 clusters | 0.98               |
| 07_16582 | Primary | no         |       | 2 clusters | 1.06               |
| 09_4178  | Primary | yes        | 2     | 2 clusters | 0.63               |
| 09_4615  | Primary | no         |       | 1 cluster  | 0.91               |
| 10_5283  | Primary | no         |       | 2 clusters | 0.98               |
| 11_3318  | Primary | yes        | 2     | 2 clusters | 0.78               |
| 11_6165  | Primary | yes        | 2     | 2 clusters | 0.47               |
| 11_17815 | Primary | no         |       | 1 cluster  | 1.00               |
| 236      | Primary | no         |       | 1 cluster  | 0.71               |
| 540      | Primary | no         |       | 1 cluster  | 0.75               |
| 609      | Primary | no         |       | 1 cluster  | 0.65               |
| 705      | Primary | no         |       | 1 cluster  | 0.90               |
| 1346     | Primary | no         |       | 1 cluster  | 0.28               |
| 1739     | Primary | no         |       | 1 cluster  | 0.79               |
| 1781     | Primary | no         |       | 1 cluster  | 1.05               |
| 1947     | Primary | no         |       | 2 clusters | 1.01               |
| 2039     | Primary | yes        | 2     | 2 clusters | 0.73               |
| 2237     | Primary | no         |       | 1 cluster  | 1.02               |
| 2238     | Primary | no         |       | 1 cluster  | 1.08               |
| 3492     | Primary | yes        | 2     | 2 clusters | 0.22               |
| 4133     | Primary | yes        | 2     | 2 clusters | 0.42               |
| 6277     | Primary | no         |       | 1 cluster  | 0.73               |
| 7097     | Primary | no         |       | 1 cluster  | 0.53               |
| 7136     | Primary | yes        | 2     | 2 clusters | 0.88               |
| 7441     | Primary | no         |       | 1 cluster  | 1.04               |
| 9534     | Primary | yes        | 2     | 2 clusters | 0.34               |
| 65115    | Primary | no         |       | 1 cluster  | 0.77               |
| 80872    | Primary | no         |       | 1 cluster  | 0.76               |

| ID       | Cohort  | Subclonal? | # SCP | # Clusters | Upper bound 95% CI |
|----------|---------|------------|-------|------------|--------------------|
| 111097   | Primary | no         |       | 1 cluster  | 1.15               |
| 118135   | Primary | yes        | 2     | 2 clusters | 0.62               |
| 122891   | Primary | no         |       | 1 cluster  | 0.95               |
| 142990   | Primary | no         |       | 1 cluster  | 0.49               |
| 148632   | Primary | yes        | 3     | 3 clusters | 0.36               |
| 671204   | Primary | yes        | 2     | 2 clusters | 0.34               |
| 980452   | Primary | no         |       | 1 cluster  | 0.26               |
| 990149   | Primary | no         |       | 1 cluster  | 0.36               |
| 2000120  | Primary | yes        | 2     | 2 clusters | 0.71               |
| 2000136  | Primary | no         |       | 1 cluster  | 0.55               |
| 2000756  | Primary | no         |       | 1 cluster  | 0.51               |
| 36773720 | Primary | yes        | 4     | 4 clusters | 0.58               |
| YLE001   | Primary | yes        | 2     | 2 clusters | N/A                |
| C2725    | R/M     | No         |       | 1 cluster  | 1.20               |
| C2954    | R/M     | No         |       | 1 cluster  | 1.05               |
| C3070    | R/M     | Yes        | 5     | 5 clusters | 0.45               |
| D3212    | R/M     | Yes        | 4     | 4 clusters | 0.45               |
| F0975    | R/M     | No         |       | 1 cluster  | 1.05               |
| F2608    | R/M     | Yes        | 2     | 2 clusters | 0.31               |
| F6345    | R/M     | No         |       | 1 cluster  | 0.41               |
| G3856    | R/M     | Yes        | 2     | 2 clusters | 0.92               |
| H1407    | R/M     | No         |       | 2 clusters | 1.04               |
| H1985    | R/M     | No         |       | 2 clusters | 1.12               |
| K8414    | R/M     | No         |       | 1 cluster  | 0.67               |
| M9671    | R/M     | Yes        | 2     | 2 clusters | 0.23               |
| P1849    | R/M     | No         |       | 1 cluster  | 1.03               |
| T0669    | R/M     | No         |       | 1 cluster  | 1.06               |
| W7869    | R/M     | No         |       | 1 cluster  | 0.72               |
| W9012    | R/M     | No         |       | 1 cluster  | 0.36               |

**Table S8.** Pathogenic germline variants detected in recurrent/metastatic adenoid cystic carcinoma.

| Sample   | Chr | Start     | Ref | Alt     | VariantClass | Gene   | Exon   | TranscriptID | cDNAchange         | Penetrance | Type       | ACMG Category |
|----------|-----|-----------|-----|---------|--------------|--------|--------|--------------|--------------------|------------|------------|---------------|
| Sample40 | 5   | 112162961 | T   | C       | splicing     | APC    | exon12 | NM_000038    | c.1548+17T>C       | low        |            | Pathogenic    |
| Sample16 | 17  | 41215871  | A   | T       | splicing     | BRCA1  | exon18 | NM_007294    | c.5152+20T>A       | high       | DNA repair | Pathogenic    |
| Sample29 | 17  | 41201130  | A   | G       | splicing     | BRCA1  | exon22 | NM_007294    | c.5406+8T>C        | high       | DNA repair | Pathogenic    |
| Sample32 | 17  | 41203077  | T   | C       | splicing     | BRCA1  | exon21 | NM_007294    | c.5332+3A>G        | high       | DNA repair | Pathogenic    |
| Sample51 | 13  | 32968810  | T   | C       | splicing     | BRCA2  | exon25 | NM_000059    | c.9257-16T>C       | high       | DNA repair | Pathogenic    |
| Sample02 | 16  | 68855885  | T   | C       | splicing     | CDH1   | exon12 | NM_004360    | c.1712-19T>C       | high       |            | Pathogenic    |
| Sample84 | 16  | 68842578  | C   | T       | splicing     | CDH1   | exon5  | NM_004360    | c.532-18C>T        | high       |            | Pathogenic    |
| Sample59 | 3   | 37067120  | T   | A       | splicing     | MLH1   | exon12 | NM_000249    | c.1039-8T>A        | high       | DNA repair | Pathogenic    |
| Sample64 | 3   | 37067120  | T   | A       | splicing     | MLH1   | exon12 | NM_000249    | c.1039-8T>A        | high       | DNA repair | Pathogenic    |
| Sample64 | 3   | 37070265  | T   | G       | splicing     | MLH1   | exon13 | NM_000249    | c.1410-10T>G       | high       | DNA repair | Pathogenic    |
| Sample75 | 3   | 37067120  | T   | A       | splicing     | MLH1   | exon12 | NM_000249    | c.1039-8T>A        | high       | DNA repair | Pathogenic    |
| Sample79 | 3   | 37067120  | T   | A       | splicing     | MLH1   | exon12 | NM_000249    | c.1039-8T>A        | high       | DNA repair | Pathogenic    |
| Sample20 | 3   | 37067120  | T   | A       | splicing     | MLH1   | exon12 | NM_000249    | c.1039-8T>A        | high       | DNA repair | Pathogenic    |
| Sample35 | 3   | 37067120  | T   | A       | splicing     | MLH1   | exon12 | NM_000249    | c.1039-8T>A        | high       | DNA repair | Pathogenic    |
| Sample40 | 3   | 37067120  | T   | A       | splicing     | MLH1   | exon12 | NM_000249    | c.1039-8T>A        | high       | DNA repair | Pathogenic    |
| Sample41 | 3   | 37067120  | T   | A       | splicing     | MLH1   | exon12 | NM_000249    | c.1039-8T>A        | high       | DNA repair | Pathogenic    |
| Sample86 | 2   | 48033981  | T   | TTTGA   | FS_insertion | MSH6   | exon10 | NM_000179    | c.4065_4066insTTGA | high       | DNA repair | Pathogenic    |
| Sample36 | 2   | 48032033  | C   | T       | splicing     | MSH6   | exon6  | NM_000179    | c.3439-16C>T       | high       | DNA repair | Pathogenic    |
| Sample42 | 2   | 48028314  | T   | C       | splicing     | MSH6   | exon4  | NM_000179    | c.3172+20T>C       | high       | DNA repair | Pathogenic    |
| Sample58 | 2   | 48033514  | T   | C       | splicing     | MSH6   | exon8  | NM_000179    | c.3801+17T>C       | high       | DNA repair | Pathogenic    |
| Sample63 | 2   | 48033898  | T   | G       | splicing     | MSH6   | exon10 | NM_000179    | c.4002-20T>G       | high       | DNA repair | Pathogenic    |
| Sample76 | 2   | 48028314  | T   | C       | splicing     | MSH6   | exon4  | NM_000179    | c.3172+20T>C       | high       | DNA repair | Pathogenic    |
| Sample30 | 2   | 48033981  | T   | TTTGA   | FS_insertion | MSH6   | exon10 | NM_000179    | c.4065_4066insTTGA | high       | DNA repair | Pathogenic    |
| Sample20 | 17  | 29679439  | T   | C       | splicing     | NF1    | exon51 | NM_001042492 | c.7615+7T>C        | high       |            | Pathogenic    |
| Sample24 | 17  | 29587544  | C   | G       | splicing     | NF1    | exon34 | NM_001042492 | c.4577+11C>G       | high       |            | Pathogenic    |
| Sample26 | 22  | 30000121  | G   | T       | splicing     | NF2    | exon1  | NM_000268    | c.114+20G>T        |            |            | Pathogenic    |
| Sample43 | 22  | 30064307  | C   | T       | splicing     | NF2    | exon10 | NM_000268    | c.886-15C>T        |            |            | Pathogenic    |
| Sample67 | 10  | 89720633  | C   | CTTT    | splicing     | PTEN   | exon8  | NM_000314    | c.802-18->TTT      |            |            | Pathogenic    |
| Sample12 | 13  | 48934275  | A   | G       | splicing     | RB1    | exon7  | NM_000321    | c.718+12A>G        |            |            | Pathogenic    |
| Sample51 | 13  | 49050826  | G   | A       | splicing     | RB1    | exon25 | NM_000321    | c.2521-11G>A       |            |            | Pathogenic    |
| Sample64 | 13  | 49039118  | T   | A       | splicing     | RB1    | exon22 | NM_000321    | c.2212-16T>A       |            |            | Pathogenic    |
| Sample18 | 5   | 225697    | G   | C       | splicing     | SDHA   | exon4  | NM_004168    | c.456+20G>C        | high       |            | Pathogenic    |
| Sample45 | 5   | 225515    | G   | T       | splicing     | SDHA   | exon4  | NM_004168    | c.313-19G>T        | high       |            | Pathogenic    |
| Sample80 | 5   | 225697    | G   | C       | splicing     | SDHA   | exon4  | NM_004168    | c.456+20G>C        | high       |            | Pathogenic    |
| Sample23 | 11  | 61205337  | C   | CTT     | splicing     | SDHAF2 | exon2  | NM_017841    | c.260+17->TT       |            |            | Pathogenic    |
| Sample50 | 1   | 17354373  | G   | GGAAGAA | splicing     | SDHB   | exon6  | NM_003000    | c.424-13->TTCTTC   | high       |            | Pathogenic    |
| Sample80 | 1   | 17355075  | A   | T       | splicing     | SDHB   | exon5  | NM_003000    | c.423+20T>A        | high       |            | Pathogenic    |
| Sample83 | 1   | 17355075  | A   | T       | splicing     | SDHB   | exon5  | NM_003000    | c.423+20T>A        | high       |            | Pathogenic    |

**Table S9.** BRCA1/BRCA2 second hit analysis.

| Sample   | Chr | Variant Class | Gene  | Exon   | cDNA         | N_Total Depth | N_Ref Count | N_Alt Count | N_Alt Freq | Tumour AlleleStatus | Somatic BRCA Variant |
|----------|-----|---------------|-------|--------|--------------|---------------|-------------|-------------|------------|---------------------|----------------------|
| Sample16 | 17  | splicing      | BRCA1 | exon18 | c.5152+20T>A | 574           | 324         | 250         | 0.43554    | Diploid             | None                 |
| Sample32 | 17  | splicing      | BRCA1 | exon21 | c.5332+3A>G  | 649           | 325         | 324         | 0.49923    | Diploid             | None                 |
| Sample29 | 17  | splicing      | BRCA1 | exon22 | c.5406+8T>C  | 586           | 286         | 300         | 0.51195    | Gain                | None                 |
| Sample51 | 13  | splicing      | BRCA2 | exon25 | c.9257-16T>C | 324           | 162         | 162         | 0.5        | Diploid             | None                 |

**Table S10.** MSISensor score for MSK-IMPACT recurrent/metastatic adenoid cystic carcinoma cases.

| No. | Sample ID         | Patient ID | MSI Score | No. | Sample ID         | Patient ID | MSI Score |
|-----|-------------------|------------|-----------|-----|-------------------|------------|-----------|
| 1   | P-0007699-T02-IM5 | P-0007699  | 3.87      | 50  | P-0003327-T01-IM5 | P-0003327  | 0.24      |
| 2   | P-0007849-T01-IM5 | P-0007849  | 3.45      | 51  | P-0017600-T01-IM5 | P-0017600  | 0.23      |
| 3   | P-0019072-T01-IM6 | P-0019072  | 2.83      | 52  | P-0017745-T01-IM6 | P-0017745  | 0.22      |
| 4   | P-0013084-T01-IM5 | P-0013084  | 2.67      | 53  | P-0014382-T01-IM6 | P-0014382  | 0.2       |
| 5   | P-0008688-T01-IM5 | P-0008688  | 2.35      | 54  | P-0007699-T01-IM5 | P-0007699  | 0.17      |
| 6   | P-0014405-T01-IM6 | P-0014405  | 2.15      | 55  | P-0001660-T01-IM3 | P-0001660  | 0.17      |
| 7   | P-0007849-T02-IM5 | P-0007849  | 2.03      | 56  | P-0001239-T01-IM3 | P-0001239  | 0.17      |
| 8   | P-0004371-T01-IM5 | P-0004371  | 2.02      | 57  | P-0001034-T01-IM3 | P-0001034  | 0.17      |
| 9   | P-0003469-T01-IM5 | P-0003469  | 1.97      | 58  | P-0000790-T01-IM3 | P-0000790  | 0.17      |
| 10  | P-0000948-T01-IM3 | P-0000948  | 1.61      | 59  | P-0000507-T01-IM3 | P-0000507  | 0.16      |
| 11  | P-0001327-T01-IM3 | P-0001327  | 1.38      | 60  | P-0000434-T01-IM3 | P-0000434  | 0.11      |
| 12  | P-0007145-T01-IM5 | P-0007145  | 0.95      | 61  | P-0003649-T01-IM5 | P-0003649  | 0.1       |
| 13  | P-0007096-T01-IM5 | P-0007096  | 0.88      | 62  | P-0008151-T01-IM5 | P-0008151  | 0.09      |
| 14  | P-0004334-T01-IM5 | P-0004334  | 0.78      | 63  | P-0001451-T01-IM3 | P-0001451  | 0.09      |
| 15  | P-0005392-T01-IM5 | P-0005392  | 0.77      | 64  | P-0009457-T01-IM5 | P-0009457  | 0.08      |
| 16  | P-0017244-T01-IM6 | P-0017244  | 0.72      | 65  | P-0009174-T01-IM5 | P-0009174  | 0.08      |
| 17  | P-0012051-T01-IM5 | P-0012051  | 0.71      | 66  | P-0003699-T01-IM5 | P-0003699  | 0.08      |
| 18  | P-0015992-T01-IM6 | P-0015992  | 0.67      | 67  | P-0000618-T01-IM3 | P-0000618  | 0.08      |
| 19  | P-0006939-T01-IM5 | P-0006939  | 0.66      | 68  | P-0016421-T01-IM6 | P-0016421  | 0.07      |
| 20  | P-0007777-T01-IM5 | P-0007777  | 0.65      | 69  | P-0013620-T01-IM5 | P-0013620  | 0.07      |
| 21  | P-0000374-T01-IM3 | P-0000374  | 0.61      | 70  | P-0005624-T02-IM5 | P-0005624  | 0.07      |
| 22  | P-0003532-T02-IM5 | P-0003532  | 0.6       | 71  | P-0018440-T01-IM6 | P-0018440  | 0         |
| 23  | P-0008066-T01-IM5 | P-0008066  | 0.58      | 72  | P-0015401-T01-IM6 | P-0015401  | 0         |
| 24  | P-0003056-T01-IM5 | P-0003056  | 0.58      | 73  | P-0016400-T01-IM6 | P-0016400  | 0         |
| 25  | P-0010654-T01-IM5 | P-0010654  | 0.53      | 74  | P-0015101-T01-IM6 | P-0015101  | 0         |
| 26  | P-0001201-T01-IM3 | P-0001201  | 0.47      | 75  | P-0014709-T01-IM6 | P-0014709  | 0         |
| 27  | P-0000717-T01-IM3 | P-0000717  | 0.46      | 76  | P-0014472-T01-IM6 | P-0014472  | 0         |
| 28  | P-0012652-T01-IM5 | P-0012652  | 0.43      | 77  | P-0013838-T01-IM5 | P-0013838  | 0         |
| 29  | P-0012563-T01-IM5 | P-0012563  | 0.43      | 78  | P-0011474-T01-IM5 | P-0011474  | 0         |
| 30  | P-0002486-T01-IM3 | P-0002486  | 0.37      | 79  | P-0010663-T01-IM5 | P-0010663  | 0         |
| 31  | P-0002214-T01-IM3 | P-0002214  | 0.37      | 80  | P-0009534-T01-IM5 | P-0009534  | 0         |
| 32  | P-0000524-T01-IM3 | P-0000524  | 0.37      | 81  | P-0008227-T01-IM5 | P-0008227  | 0         |
| 33  | P-0000340-T01-IM3 | P-0000340  | 0.37      | 82  | P-0008045-T01-IM5 | P-0008045  | 0         |
| 34  | P-0000202-T01-IM3 | P-0000202  | 0.34      | 83  | P-0007857-T01-IM5 | P-0007857  | 0         |
| 35  | P-0017620-T01-IM5 | P-0017620  | 0.33      | 84  | P-0007499-T01-IM5 | P-0007499  | 0         |
| 36  | P-0001363-T01-IM3 | P-0001363  | 0.33      | 85  | P-0007102-T01-IM5 | P-0007102  | 0         |
| 37  | P-0000623-T01-IM3 | P-0000623  | 0.33      | 86  | P-0006690-T01-IM5 | P-0006690  | 0         |
| 38  | P-0009832-T01-IM5 | P-0009832  | 0.32      | 87  | P-0006518-T01-IM5 | P-0006518  | 0         |
| 39  | P-0008493-T02-IM5 | P-0008493  | 0.31      | 88  | P-0005382-T01-IM5 | P-0005382  | 0         |
| 40  | P-0002189-T01-IM3 | P-0002189  | 0.3       | 89  | P-0004887-T01-IM5 | P-0004887  | 0         |
| 41  | P-0001585-T01-IM3 | P-0001585  | 0.3       | 90  | P-0004186-T01-IM5 | P-0004186  | 0         |
| 42  | P-0001422-T01-IM3 | P-0001422  | 0.29      | 91  | P-0003532-T01-IM5 | P-0003532  | 0         |
| 43  | P-0009317-T02-IM5 | P-0009317  | 0.27      | 92  | P-0003111-T01-IM5 | P-0003111  | 0         |
| 44  | P-0015093-T01-IM6 | P-0015093  | 0.26      | 93  | P-0001810-T01-IM3 | P-0001810  | 0         |
| 45  | P-0014961-T01-IM6 | P-0014961  | 0.26      | 94  | P-0001225-T01-IM3 | P-0001225  | 0         |
| 46  | P-0006032-T01-IM5 | P-0006032  | 0.26      | 95  | P-0001220-T01-IM3 | P-0001220  | 0         |
| 47  | P-0016362-T01-IM6 | P-0016362  | 0.25      | 96  | P-0000980-T01-IM3 | P-0000980  | 0         |
| 48  | P-0008768-T01-IM5 | P-0008768  | 0.25      | 97  | P-0000792-T01-IM3 | P-0000792  | 0         |
| 49  | P-0008385-T01-IM5 | P-0008385  | 0.24      | 98  | P-0000623-T02-IM5 | P-0000623  | 0         |

## The REMARK checklist

| Item to be reported                                                                                                                                                                                                                                                                                                                        | Page no. |
|--------------------------------------------------------------------------------------------------------------------------------------------------------------------------------------------------------------------------------------------------------------------------------------------------------------------------------------------|----------|
| <b>INTRODUCTION</b>                                                                                                                                                                                                                                                                                                                        |          |
| 1 State the marker examined, the study objectives, and any pre-specified hypotheses.                                                                                                                                                                                                                                                       | 1        |
| <b>MATERIALS AND METHODS</b>                                                                                                                                                                                                                                                                                                               |          |
| <i>Patients</i>                                                                                                                                                                                                                                                                                                                            |          |
| 2 Describe the characteristics (e.g., disease stage or co-morbidities) of the study patients, including their source and inclusion and exclusion criteria.                                                                                                                                                                                 | 18       |
| 3 Describe treatments received and how chosen (e.g., randomized or rule-based).                                                                                                                                                                                                                                                            | 18       |
| <i>Specimen characteristics</i>                                                                                                                                                                                                                                                                                                            |          |
| 4 Describe type of biological material used (including control samples) and methods of preservation and storage.                                                                                                                                                                                                                           | 18       |
| <i>Assay methods</i>                                                                                                                                                                                                                                                                                                                       |          |
| 5 Specify the assay method used and provide (or reference) a detailed protocol, including specific reagents or kits used, quality control procedures, reproducibility assessments, quantitation methods, and scoring and reporting protocols. Specify whether and how assays were performed blinded to the study endpoint.                 | 18       |
| <i>Study design</i>                                                                                                                                                                                                                                                                                                                        |          |
| 6 State the method of case selection, including whether prospective or retrospective and whether stratification or matching (e.g., by stage of disease or age) was used. Specify the time period from which cases were taken, the end of the follow-up period, and the median follow-up time.                                              | 18       |
| 7 Precisely define all clinical endpoints examined.                                                                                                                                                                                                                                                                                        | 18       |
| 8 List all candidate variables initially examined or considered for inclusion in models.                                                                                                                                                                                                                                                   | 18       |
| 9 Give rationale for sample size; if the study was designed to detect a specified effect size, give the target power and effect size.                                                                                                                                                                                                      | 18       |
| <i>Statistical analysis methods</i>                                                                                                                                                                                                                                                                                                        |          |
| 10 Specify all statistical methods, including details of any variable selection procedures and other model-building issues, how model assumptions were verified, and how missing data were handled.                                                                                                                                        | 23       |
| 11 Clarify how marker values were handled in the analyses; if relevant, describe methods used for cutpoint determination.                                                                                                                                                                                                                  | 19       |
| <b>RESULTS</b>                                                                                                                                                                                                                                                                                                                             |          |
| <i>Data</i>                                                                                                                                                                                                                                                                                                                                |          |
| 12 Describe the flow of patients through the study, including the number of patients included in each stage of the analysis (a diagram may be helpful) and reasons for dropout. Specifically, both overall and for each subgroup extensively examined report the numbers of patients and the number of events.                             | 18       |
| 13 Report distributions of basic demographic characteristics (at least age and sex), standard (disease-specific) prognostic variables, and tumor marker, including numbers of missing values.                                                                                                                                              | 35       |
| <i>Analysis and presentation</i>                                                                                                                                                                                                                                                                                                           |          |
| 14 Show the relation of the marker to standard prognostic variables.                                                                                                                                                                                                                                                                       | 38       |
| 15 Present univariable analyses showing the relation between the marker and outcome, with the estimated effect (e.g., hazard ratio and survival probability). Preferably provide similar analyses for all other variables being analyzed. For the effect of a tumor marker on a time-to-event outcome, a Kaplan-Meier plot is recommended. | 38       |
| 16 For key multivariable analyses, report estimated effects (e.g., hazard ratio) with confidence intervals for the marker and, at least for the final model, all other variables in the model.                                                                                                                                             | n/a      |
| 17 Among reported results, provide estimated effects with confidence intervals from an analysis in which the marker and standard prognostic variables are included, regardless of their statistical significance.                                                                                                                          | n/a      |
| 18 If done, report results of further investigations, such as checking assumptions, sensitivity analyses, and internal validation.                                                                                                                                                                                                         | 5        |
| <b>DISCUSSION</b>                                                                                                                                                                                                                                                                                                                          |          |
| 19 Interpret the results in the context of the pre-specified hypotheses and other relevant studies; include a discussion of limitations of the study.                                                                                                                                                                                      | 11       |
| 20 Discuss implications for future research and clinical value.                                                                                                                                                                                                                                                                            | 11       |

## **INTRODUCTION**

### **1. State the marker examined, the study objectives, and any pre-specified hypotheses.**

Using sequencing data from 1043 adenoid cystic carcinoma patients (ACC), we investigated the genomic differences between primary ACC and recurrent/metastatic (R/M) ACC.

The objective of the study was to evaluate the underlying genomic hallmarks of ACC progression, evaluate for intratumoral heterogeneity, and assess for pathogenic germline alterations.

The pre-specified hypothesis was that significant differences in the mutational landscape between primary and R/M ACC may help better characterize risk of progression as well as delineate prognosis.

## **MATERIALS AND METHODS**

### **2. Describe the characteristics (e.g., disease stage or co-morbidities) of the study patients, including their source and inclusion and exclusion criteria.**

Patients were diagnosed with ACC of varying stages from various institutions (**Table S1**), including patients with recurrent/metastatic disease. Cases were required to have either whole exome sequencing, whole genome sequencing, or targeted panel sequencing.

### **3. Describe treatments received and how chosen (e.g., randomized or rule-based).**

This study was retrospective. Treatments were generally upfront surgery followed by postoperative radiation. Six patients with R/M ACC underwent trials with tyrosine kinase inhibitors based on identified PIK3CA mutations.

### **4. Describe type of biological material used (including control samples) and methods of preservation and storage.**

Tumor specimens for whole exome or whole genome sequencing were obtained at the time of surgery or by biopsy and snap frozen in liquid nitrogen, and stored at -80°C. Primary specimens were obtained prior to treatment, while R/M specimens typically had undergone prior therapy. Blood samples for control specimens were collected by peripheral venous puncture. Tumor specimens for targeted panels were obtained from paraffin embedded tissue, which were stored in room temperature.

### **5. Specify the assay method used and provide (or reference) a detailed protocol, including specific reagents or kits used, quality control procedures, reproducibility assessments, quantitation methods, and scoring and reporting protocols. Specify whether and how assays were performed blinded to the study endpoint.**

Sequencing data from other institutions were obtained via publicly accessible database, with mutation calls described in their respective publications. All primary ACC cases (n=177) underwent whole exome or whole genome sequencing as described previously. R/M cases either underwent whole exome sequencing (n=16) or targeted sequencing panels (n=851), either by MSK-IMPACT or Foundation Medicine commercial assay. The assays were not performed blinded to the study endpoint.

- 6. State the method of case selection, including whether prospective or retrospective and whether stratification or matching (e.g., by stage of disease or age) was used. Specify the time period from which cases were taken, the end of the follow-up period, and the median follow-up time.**

Retrospective case selection was performed based on available studies and unpublished data, spanning 2013 until current time. Stratification by primary vs R/M status was performed.

- 7. Precisely define all clinical endpoints examined.**

Overall survival time was defined to be the period from diagnosis (either from primary tumor or R/M tumor) to date of death.

- 8. List all candidate variables initially examined or considered for inclusion in models.**

Cox survival analysis was performed based on mutational subgroups. Alterations examined were determined by standard whole genome sequencing, whole exome sequencing, or pre-determined targeted panels (e.g., MSK-IMPACT, Foundation Medicine).

- 9. Give rationale for sample size; if the study was designed to detect a specified effect size, give the target power and effect size.**

Sample size was determined based on available published studies and available unpublished data from participating institutions.

- 10. Specify all statistical methods, including details of any variable selection procedures and other model-building issues, how model assumptions were verified, and how missing data were handled.**

For comparing primary vs R/M mutation rates, odds ratios were used for assessing statistical significance. Survival analysis was performed via Kaplan-Meier methodology and compared with the log-rank test. All statistical tests were two-sided, and a p-value <0.05 was considered statistically significant. ACC molecular subgroups were compared for mutual exclusivity using the Benjamini-Hochberg false discovery rate method.

- 11. Clarify how marker values were handled in the analyses; if relevant, describe methods used for cutpoint determination.**

Mutations were culled from published datasets, each with its own specific mutation callers and pipeline analysis as previously described. Unpublished datasets from a given institution underwent similar pipelines as published datasets from that respective institution.

## **RESULTS**

- 12. Describe the flow of patients through the study, including the number of patients included in each stage of the analysis (a diagram may be helpful) and reasons for dropout. Specifically, both overall and for each subgroup extensively examined report the numbers of patients and the number of events.**

Collectively, there were 1043 ACC patients studied (177 primary, 868 R/M cases). Of the R/M cases, 94 cases underwent MSK-IMPACT targeted panels, while 730 cases underwent Foundation Medicine

targeted panels. As the Foundation Medicine panels changed over time regarding gene coverage, each case was linked to the particular panel, ensuring correct mutational incidence. All 94 MSK-IMPACT patients had available data to perform survival analysis as well as secondary germline analysis. Of the 94 MSK-IMPACT patients, 58 had available exome and copy number data to assess intratumoral genetic heterogeneity.

**13. Report distributions of basic demographic characteristics (at least age and sex), standard (disease-specific) prognostic variables, and tumor marker, including numbers of missing values.**

Distribution by anatomic site was 89.8% (head and neck/salivary), 6.8% (lung), and 3.4% (breast) (Figure S1). See Figure 1 for distribution by gender.

**14. Show the relation of the marker to standard prognostic variables.**

For survival outcomes stratified by mutation or molecular subgroup, see Figure 3 and Figure 4. Significantly poorer prognosis was noted for cases with *NOTCH1* mutations, *NOTCH1* activating mutations, and *KDM6A* mutations, while *MYB(+)/NOTCH1(+)* mutations exhibited the worst outcomes of the molecular subgroups.

**15. Present univariable analyses showing the relation between the marker and outcome, with the estimated effect (e.g., hazard ratio and survival probability). Preferably provide similar analyses for all other variables being analyzed. For the effect of a tumor marker on a time-to-event outcome, a Kaplan-Meier plot is recommended.**

See Figure 3 and Figure 4.

**16. For key multivariable analyses, report estimated effects (e.g., hazard ratio) with confidence intervals for the marker and, at least for the final model, all other variables in the model.**

No multivariable analysis was performed in this study.

**17. Among reported results, provide estimated effects with confidence intervals from an analysis in which the marker and standard prognostic variables are included, regardless of their statistical significance.**

No estimated effects with confidence intervals were utilized for this study.

**18. If done, report results of further investigations, such as checking assumptions, sensitivity analyses, and internal validation.**

Since most R/M cases were sequenced at higher depth with targeted NGS panels, we assessed the possibility that those mutations enriched in R/M cases might have been mutations with low variant allelic fraction (VAF), below the resolution of WES. None of the mutations that were enriched in R/M cases had  $VAF < 0.05$  (a conservative detection threshold in 100x WES11-13) in more than 5% of the cases, with the majority between 0-2% (Table S5). To compare the sensitivity of WES (at ~100x) to targeted NGS (at ~600x) for the detection of these enriched mutations, we downsampled the reads from R/M cases

sequenced on the MSK-IMPACT platform to 100x. This minimally altered the resulting VAFs (**Figure S3**), with average change in VAF of 0.011, and only one enriched mutation (1/101, or 1%) was not detected at the downsampled depth (**Table S6**). In addition, a further comparison of primary and R/M ACC cases undergoing sequencing with WES showed clear enrichment of many of the same genes in the original analysis (**Table S7**). Altogether, these analyses confirm that the enriched rate of mutations in these genes in R/M cases is unlikely to be an artifact of differences in sequencing depth.

## DISCUSSION

### **19. Interpret the results in the context of the pre-specified hypotheses and other relevant studies; include a discussion of limitations of the study.**

The cohort of over 800 metastatic ACCs is unprecedented for this disease and sizable for any orphan disease. By performing these comparisons in the largest cohort of genomically profiled ACCs to date, new and biologically meaningful findings emerge, such as:

- The highly enriched genes in R/M cases (only *NOTCH1* had been previously reported to be enriched)
- The molecular subgroups of ACC (defined by *MYB*, *NOTCH1*, and *TERT*)
- The patterns of cooperation and mutual exclusivity between genes, including the cooperation between *NOTCH1* and chromatin modifiers, supporting the hypothesis of pioneer and settler factors in the Notch pathway
- The prognostic implications of certain genes
- The analysis of levels of clinical actionability of mutations in ACC (including the PI3K cases, which are the first case series of successful biomarker-driven therapy in ACC)
- The widespread nature of intratumor heterogeneity across a large number of tumors
- The first report of germline mutations in ACC

Limitations include the lack of clinical data for many cases, as well as the different methodologies for sequencing. *MYB*/*MYBL1* status was also not available for all patients. In particular WES/WGS platforms differ from targeted panels, though our Downsampling analysis confirmed that sequencing depth did not seem to impact sensitivity of mutation detection.

### **20. Discuss implications for future research and clinical value.**

In this study, we confirm enrichment of mutations in R/M cases and outline molecular subgroups that may better characterize R/M ACC for prognostic purposes, as well as outline biologic means of progression. The prevalent intratumoral heterogeneity noted also belies the common assumption that ACC harbors a quite genome. The preliminary reporting of pathogenic germline alterations also suggests the unexpected possibility of heredity in this malignancy, though this requires further investigation.
